# Supplementary material
Source: PubMed Central journal article supplement (PMC4933311)
Supplement: NIHMS796350-supplement-Supplement.pdf [file NIHMS796350-supplement-Supplement.pdf]

# Supplementary Text

## Contents

|                                                  |          |
|--------------------------------------------------|----------|
| <b>Data Retrieval</b>                            | <b>2</b> |
| <b>Data Preprocessing</b>                        | <b>2</b> |
| <b>Quality Control</b>                           | <b>2</b> |
| Sample Correlation Analysis . . . . .            | 2        |
| Average Across Replicates . . . . .              | 2        |
| Batch Effects Correction . . . . .               | 3        |
| <b>Differential Expression Analysis</b>          | <b>3</b> |
| <b>Meta Analysis of Gene Expression Datasets</b> | <b>4</b> |
| Fisher's Combined Probability Test . . . . .     | 4        |
| Meta-rank Analysis . . . . .                     | 4        |
| Sex-linked Genes . . . . .                       | 5        |
| The Jackknife Procedure . . . . .                | 5        |
| <b>Functional Enrichment Analysis</b>            | <b>5</b> |
| <b>Literature Derived Candidate Genes</b>        | <b>6</b> |
| <b>Network Analysis</b>                          | <b>7</b> |
| <b>Cell Type Subgroup Meta-analysis</b>          | <b>7</b> |

## Data retrieval

We retrieved gene expression datasets matching the keywords “autism” and “autistic” from the Gene Expression Omnibus (GEO <http://www.ncbi.nlm.nih.gov/geo/>) on September 10, 2012. There were no additional unique datasets found in ArrayExpress (<http://www.ebi.ac.uk/arrayexpress/>). Shortlisted datasets include human blood and brain expression profiling studies with case-control experiment designs only. A preliminary analysis was conducted on these datasets. Two datasets, GSE4187 and GSE26415 were deemed unsuitable for the analysis and thus removed, as described in the main paper.

## Data Preprocessing

In the final twelve data sets, transcriptome analyses were performed on three common commercial platforms - Affymetrix, Illumina, Agilent, as well as one non-commercial platform, TIGR. Raw data (.CEL, .MEV etc.) are often processed with various methods provided by the vendors. Whenever possible, we downloaded raw data files for datasets on Affymetrix and Illumina platforms and preprocessed them locally. Affymetrix datasets were subjected to Robust Multi-array Analysis (RMA) from the *affy* [1] package in Bioconductor. Illumina datasets were quantile normalized and  $\log_2$  transformed using the *lumi* [2] package. Datasets on the TIGR platform were not locally preprocessed as the submitters' preprocessing methods are similar across the studies. There is only one dataset that uses Agilent arrays. Standard preprocessing is not necessary. Sample sources and tissue types for each dataset are specified in Supplementary Table 1.

## Quality Control

The processed data were then subjected to an additional set of quality controls. We identified and excluded 17 samples that were used in more than one study, retaining data for the samples in the study with a smaller samples size. We removed eight samples from subjects with syndromic disorders of known genetic etiology (Fragile-X syndrome), nine non-ASD cases with mental retardation, as well as samples which were prepared differently than the rest of the samples (e.g. formalin fixed). Further details of exclusion are in Supplementary Table 3.

## Sample Correlation Analysis

We removed sample outliers using a sample correlation analysis. Outlier samples were identified as those with correlation more than two standard deviations from the mean sample-to-sample expression profile correlation, and removed iteratively until no samples met the threshold for removal. This resulted in the removal of a total of 54 samples, affecting seven studies. The remaining samples in the dataset were renormalized using quantile normalization.

## Average Across Replicates

The identification of independent units is crucial for statistical analysis, because hidden correlations (Supplementary Figure 1) can lead to biases and inflate statistical significance [3]. As the question of interest in our study concerns a biological comparison between whole organisms, that is individuals with ASD and individuals

without ASD, we define independent biological units as unique individual subjects in each dataset. Multiple samples obtained from the same subject are regarded as technical replicates. Two of the studies included technical replicates for some specimens, in which case we computed the mean of the expression values to get a single expression profile for each subject.

## Batch Effects Correction

We also looked at possible batch effects whenever batch information is available. Batch information was obtained by automated extraction of “scan dates” or “users” from raw data files, as well as supplementary texts and metadata provided by submitters. To detect possible batch effects, we compared the first two principal components to batch data, and visually identify groups that are separated by the principal components. The amount of variation explained by each principal component is also reported (Supplementary Figure 2). The *global test* method implemented in the bioconductor package of the same name is used as a secondary measure to obtain a significant value for the association between batch and the expression values (data not shown). In this analysis, we also discovered 34 samples in which batch effects were confounded with the case grouping. These samples were removed. In other datasets, we corrected for possible batch effects using ComBat [4] after discarding probes that are missing in more than 20% of the samples. Batch effects could not be corrected in GSE28521 due to small batch sizes, such that priors cannot be estimated in ComBat. Illumina slide numbers were used as batch information here.

## Differential Expression Analysis

Differential expression analysis was conducted using analysis of variance (ANOVA) based on an empirical Bayes approach provided in the *limma* R package. For each dataset, we conducted a two group disease-control comparison for all probes. Phenotypic subgroups (Supplementary Table 2) were pooled into one generic autism disease group. To consider the direction of expression change in the meta-analyses, we computed one-tailed p-values from the resulting two-tailed p-values and t-statistics. Probes were annotated with platform specific annotations in Gemma [5], where gene assignments are made based on current genome annotations obtained via sequence analysis. Each data set was then collapsed to the gene level to allow cross-platform integration. This was done by taking the probe with the Bonferroni corrected minimum p-value (best scoring probe,  $n \times \min(p) < \alpha$ ), as the smallest p-value is least likely to occur by chance [6]. We excluded probes that map to multiple genes or do not map to a gene at all are from the analysis. The proportion of differentially expressed genes ( $\pi_1 = 1 - \pi_0$ ) was estimated using the *qvalue* package in R. As the internal “bootstrap” method in the package does not return a standard error, we computed  $\pi_0$  standard errors over one hundred bootstrap iterations locally.  $\pi_0$  values from the “bootstrap” and “smoother” method were similar. We grouped  $\pi_0$  values according to factors like sample size, tissue type, platform type, but there were no obvious trends.

We next compared the results from our re-analysis to that of previous publications, and evaluated the outcomes using the area under the receiver operating characteristic curve (AU-ROC, equivalent to the Wilcoxon rank-sum test), as well as average precision (AP, equivalent to the area under the precision-recall curve). The AU-ROC gives a probability for which a true positive is ranked higher than a false positive. AP gives us the amount of correct hits from the top  $N$  ranked genes, averaged across  $N = \{1..n\}$ , where  $n$  is the total number of genes in the rankings. While AU-ROC is an evaluation of where the true positives lie relative to the false positives, AP is sensitive to genes with higher rankings (top hits). The same threshold free evaluation measures are also used in later sections.

## Meta Analysis of Gene Expression Datasets

We used a relative approach for this meta-analysis, such that each dataset was individually analyzed, and the results were subsequently combined. Two separate meta-analyses were conducted for the blood and brain data sets. We required each gene to be present in at least three datasets in each of the meta-analyses.

### Fisher's Combined Probability Test

Fisher's combined probability test [7] takes the raw p-value calculated from the individual differential expression analysis for a gene across all datasets and combines them to generate a summary statistic (S) using the equation:

$$S_i = -2 \sum_{j=1}^k \log(p_i)$$

Using this method, we combined our results from multiple independent tests, all having the same null hypothesis (no difference between autism and control groups). Under the null hypothesis, the resulting test statistic has a  $\chi^2$  distribution. P-values for meta-analysis can then be obtained from the test-statistic using the  $\chi^2$  distribution with  $2k$  degrees of freedom. We corrected the p-values for multiple testing using the Benjamini Hochberg [8] correction method. The resulting FDR represents the proportion of false positives among all the positive results returned at a given threshold.

### Meta-rank Analysis

The meta-rank analysis is a rank aggregation strategy that involves using the average rank of the gene instead of the combination of p-values. For each individual gene, its rank was determined by their order of p-values. The smallest p-value in an experiment would have the highest rank. The meta-rank of gene  $i$  is computed by averaging the ranks across datasets 1 to  $k$ ,

$$R_i = \frac{1}{k} \sum_{j=1}^k R_{ij}$$

The ranks of these averages were then computed for all genes. This method is less sensitive to possible dataset bias, where one potentially extremely low p-value could skew the results and have it dominate the combined result from Fisher's method. In other words, we can detect individual data sets that produce deviant significance values. However, unlike the Fisher's combined probability test, the distribution of ranks cannot be represented by a known statistical distribution.

In order to obtain a test statistic, we computed the permutation null distribution. We randomly permute the p-values in each study, and recalculate the metric  $R^*$ . Repeating the process 10000 times gives an  $M \times 10000$  matrix of permuted values, where  $M$  is the number of genes. The permutation null is then the empirical distribution of all values in that matrix. We can assess for significance by testing against the permutation null.

$F(x)$  is a function of the empirical cumulative distribution of the permutation null, where  $x$  is a random variable, which is, in this case, the metarank of gene  $i$ . This is computed for the number of studies,  $k = 3, 4, 5, \dots, 9$  for the null distribution of blood data and  $k = 3$  for brain data. To ensure that the meta-signature genes are not sensitive to the choice of the meta-analysis method used, we reanalyzed both blood and brain datasets

using the method described. The rank correlations between these two methods are 0.80 and 0.61 for brain and blood datasets respectively (averaged over up-regulated and down-regulated lists), suggesting that there are some discrepancies between these methods. However, by quantifying the predictive power of this method with respect to meta-signatures from Fisher's method, we observed that the choice of method will not have a substantial effect on our selection of the top hits in the signatures (Supplementary Figure 4). Subsequent functional analyses were thus based on results yield from Fisher's method.

## Sex-linked genes and other biological factors that might affect gene expression

Close inspection of differentially expressed genes revealed an abundance of highly differentially expressed sex-linked genes, such as USP9Y (Supplementary Figure 5. This can be attributed to the unbalanced study design where not all sibling pairs are sex-matched. Specifically, the propensity for the probands to be male in GSE37772 (OR=5.73, Supplementary Table 4) resulted in the surfacing of Y-linked genes. To eradicate the identified bias, we excluded Y-linked genes as well as autosomal genes showing evidence of sexual dimorphism in downstream analysis. As global expression profiles differ in the blood and brain, sex biased genes reported in Kang et al [9] were used to identify sexually dimorphic genes in the brain meta-signature, and those reported in Whitney et al [10] were used for the blood meta-signature. We also excluded genes that have been shown to escape X-inactivation [11]. Only those showing strong evidence (royal blue, violet and indigo;  $n = 61$ ) in the cited study are selected for exclusion here.

A previous analysis has been done by Mistry et al to investigate gene expression changes affected by other biological factors in postmortem human brain, such as age, and postmortem interval (PMI) [12]. To check whether the results of our analysis are impacted by these factors, we overlapped signatures from the brain with the genes reported. In general, this meta-analysis is minimally affected as only three genes (PMI: HMOX1, HINT2; Age: FDX1L) were flagged. Generally these genes were not highly ranked in the meta signatures compared to other genes (AU-ROC).

## The Jackknife Procedure

As the combined probability method applied has a propensity to skew towards a single deviant p-value for any gene in a study, we used a jackknife approach to further select for genes that are robust to the analysis [13]. The jackknife procedure implemented in the *bootstrap* R package involves repeating the meta-analysis  $k$  times, where  $k$  is the number of data sets. For each trial  $k$ , the  $k^{th}$  data set is left out. The agreement among these  $k$  jackknife meta-analyses was used as a basis for identifying a "core" signature that excludes genes appearing due to the influence of a single data set. Specifically, genes found in the top 200 across every core signature are considered robust.

## Functional Enrichment Analysis

Gene set enrichment analysis was performed using ErmineJ Version 3.0 ([14], <http://erminej.chibi.ubc.ca>), a software for determining enrichment of *Gene Ontology* (GO) [15] terms for a given gene list. GO terms represent a controlled vocabulary that links a certain molecular function, biological process, or cellular component to genes. We focused on terms under the "biological process" tree for our analysis. Significant enrichment of a specific GO term could suggest that the gene list is enriched for genes involved in a particular biological process. The PrecisionRecall (PR) method is used here. PR uses average precision

as a scoring function, thus it is sensitive to genes at the top of the rankings, without having to set a threshold. For each run, the negative log of Fisher's corrected p-values were used as the input, testing against gene sets within the 5 – 200 size range over 500000 iterations [16]. We ran enrichment analysis on meta-analysis results of gene expression in blood and brain. Additionally, we performed meta-analyses on functional enrichment results of each individual data set, in both blood and brain. We used a jackknife analysis to identify concordantly dysregulated gene sets across all studies. We observed a relatively high enrichment of “cellular respiration” (GO:0045333) genes in brain expression data with both methods.

We also downloaded additional candidate gene sets from the Simons Foundation Autism Research Initiative (SFARI) database ([www.sfari.org](http://www.sfari.org), retrieved in December 2012). Seven categories were established by SFARI based on their gene scoring syndrome - 1. High Confidence; 2. Strong Candidate; 3. Suggestive Evidence; 4. Minimal Evidence; 5. Hypothesized; 6. Not Supported; S Syndromic. We tested for enrichment of ASD candidate genes in Categories 2-5 and "S". As a control, we also tested Category 6. Category 1 was empty and thus excluded for analysis.

## Literature Derived Candidate Genes

We performed a literature search for the candidate genes derived using Phenocarta [17](<http://phenocarta.chibi.ubc.ca>) as a main resource. Using this resource, we captured 807 genes under the umbrella term “autism spectrum disorder”. Candidate genes from model organisms (mouse = 11, zebrafish = 1) were mapped to their human homologs using *HomoloGene* (<ftp://ftp.ncbi.nih.gov/pub/HomoloGene/>, build 67), resulting in 798 unique human genes. In addition to studies in Table 1, significantly differentially expressed genes from three additional expression profiling studies [18–20] for which data were not publicly available, as well as Hu et al.'s study that was excluded entirely due to duplicated samples (GSE4187, [21]) were obtained and compared to our results. There were no overlaps from Hu et al. and Glatt et al.'s studies. Because autism has been repeatedly associated with schizophrenia, we were also interested to see if there were similarities between the autism meta signatures and schizophrenia meta signatures. We obtained the list of differentially expressed genes reported in a genome-wide expression profiling study of combined cohorts in schizophrenia [13] and compared it with our brain meta-signatures. Results suggest that there are some similarities between autism and schizophrenia expression profiles in postmortem brain (Supplementary Figure 11).

## CNV Enrichment Analysis

Copy number variation data was obtained from the Autism Chromosomal Rearrangement Database (ACRD, <http://projects.tcag.ca/autism/>) [22], Sanders et al [23] (Table S4 in original study) as well as Pinto et al [24] (Table S8 in original study), obtaining a total of 1023 CNVs. These variants are thought to be pathological, but to ensure uniformity, we computed their frequencies in the Database of Genomic Variants (DGV, retrieved in March 2013) [25] as described in Sanders et al. We identified seven common CNVs. After lifting the genomic coordinates genes over to hg18 (to match CNV data) using the UCSC liftOver tool [26] (<http://genome.ucsc.edu/cgi-bin/hgLiftOver>), Fisher's exact test was used to compute global enrichment of dysregulated genes in ASD-associated rare CNV (n=1016). To reduce the amount of overlap in computing enrichment of dysregulated genes, we merged individual CNVs into CNV regions using a 90% reciprocal overlap. We also merged small CNVs that are completely nested within larger CNVs by taking the breakpoints of the larger CNV (union). The total number of merged CNV regions is 732 (Gain=385, Loss=340, Unknown=1). We

included all classes of CNV transmissions (inherited, de novo, unknown). Restricting our analysis to de novo CNVs did not substantially affect the results.

## Single Nucleotide Polymorphisms (SNPs) in Candidate Genes

To see if common SNPs could potentially affect the expression levels of our candidate genes and lead to false positives, we looked for common SNPs ( $\geq 1\%$  minor allele frequency, UCSC build 138, <http://hgdownload.cse.ucsc.edu/goldenpath/hg19/database/>) within probes used in various platforms analyzed in this study. Instead of using gene mappings provided by different platform manufacturers, we obtained probe alignments (hg19) from Gemma [5] as sequence analysis is uniformly performed across all platforms. The results are presented in Supplementary Tables 7- 10. Some of the probes (denoted NA) have been excluded for gene mapping in Gemma due to poor sequence alignment [27]. Several probes that target genes on sex chromosomes align to genomic regions in both chromosomes X and Y. Readers should be aware of this ambiguity when analyzing these genes, as with other sex-linked genes flagged in the results table.

## Network Analysis

We conducted the network analysis on a human protein-protein interaction (PPIN) network. The PPIN network comprise data from the Human Protein Reference Database (HPRD) [28], Molecular Interaction Database(MINT) [29], Database of Interacting Proteins (DIP) [30], innateDB [31] and irefIndex [32]. With the aggregated network, we computed local network properties for the core candidate gene sets. 10000 random gene sets with similar size and node degree were sampled from the network to construct permutation distributions of the average shortest path length (Dijkstra's algorithm) and local clustering coefficient [13]. The results are in Supplementary Figure 10

## Cell Type Subgroup Meta-analysis

We investigated the impact of cell type heterogeneity by conducting separate analyses on a homogenous subgroup comprising data sets with samples from LCL, and a non-LCL subgroup comprising datasets with samples from whole blood and lymphocytes. At an FDR threshold of 0.05, we observed 1 down regulated gene and 35 up-regulated genes in the LCL subgroup; there were 164 up-regulated genes and 143 down-regulated genes in the non-LCL subgroup. The large number of genes found in the non-LCL subgroup is likely due to the lack of independence between two data sets from the same study, GSE18123.1 and GSE18123.2 (Supplementary Figure 16). We applied the jackknife procedure to detect core signatures in each subgroup. As seen in Supplementary Figure 14, we found 17 up-regulated and 10 down-regulated core signature genes in the LCL subgroup. In the non-LCL subgroup, there were 9 up-regulated and 8 down-regulated core signature genes (Supplementary Figure 15). While additional genes were detected in this subgroup analysis, the trends were not strong across data sets in each subgroup (Supplementary Figure 13). Further investigations are required to determine the significance of these genes.

# Supplementary Tables

## List of Supplementary Tables

|    |                                                                                                                                                                                                                                                                                                                                                                                                                                                                                                                          |    |
|----|--------------------------------------------------------------------------------------------------------------------------------------------------------------------------------------------------------------------------------------------------------------------------------------------------------------------------------------------------------------------------------------------------------------------------------------------------------------------------------------------------------------------------|----|
| 1  | Summary of tissue sources. . . . .                                                                                                                                                                                                                                                                                                                                                                                                                                                                                       | 9  |
| 2  | Summary of diagnosis criteria and ASD phenotypes in the original studies. Refer to Table 1 for study citations. . . . .                                                                                                                                                                                                                                                                                                                                                                                                  | 10 |
| 3  | a) Samples excluded in each study; b) Summary statistics of samples removed. Asterisks denote data sets with technical replicates. The remaining samples comprise unique subjects only. . . . .                                                                                                                                                                                                                                                                                                                          | 11 |
| 4  | Demographics I - Gender. Gender imbalance is seen in some data sets, such as GSE37772. OR: Odds ratio. . . . .                                                                                                                                                                                                                                                                                                                                                                                                           | 12 |
| 5  | Demographics II - Age, PMI and race of subjects in each study. . . . .                                                                                                                                                                                                                                                                                                                                                                                                                                                   | 13 |
| 6  | Overlap between results reported in the literature and individual re- analysis of differential expression. Per dataset significant probes reported at FDR < 0.05. Gene symbols are used as a proxy for probes in GSE18123.1; GenBank accessions are used in GSE15451 and GSE15402; Spot IDs are used for GSE7329. GSE25507 computed differences in expression variance instead of differential expression; GSE37772 reported outlier genes instead of differentially expressed genes; GSE32136 is not published. . . . . | 14 |
| 7  | Up-regulated meta-signature in brain. . . . .                                                                                                                                                                                                                                                                                                                                                                                                                                                                            | 15 |
| 8  | Down-regulated meta-signature in brain. . . . .                                                                                                                                                                                                                                                                                                                                                                                                                                                                          | 15 |
| 9  | Up-regulated meta-signature in blood. . . . .                                                                                                                                                                                                                                                                                                                                                                                                                                                                            | 15 |
| 10 | Down-regulated meta-signature in blood. . . . .                                                                                                                                                                                                                                                                                                                                                                                                                                                                          | 15 |
| 11 | All genes and respective p-values in the SFARI syndromic category. . . . .                                                                                                                                                                                                                                                                                                                                                                                                                                               | 16 |
| 12 | Top genes in the "cellular respiration" GO category at a meta-analysis raw p-value threshold of 0.0001. There are a total of 116 genes in this functional group. . . . .                                                                                                                                                                                                                                                                                                                                                 | 17 |
| 13 | a) Comparisons between core signatures and lists of differentially expressed genes from original studies; b) Pairwise comparisons of original hits. . . . .                                                                                                                                                                                                                                                                                                                                                              | 18 |
| 14 | Dysregulated genes (FDR<0.05, meta-signature) within ASD-associated CNV. Fisher's exact test was used to compute significance. NS: Not significant. . . . .                                                                                                                                                                                                                                                                                                                                                              | 19 |
| 15 | Meta-signature genes that are also dysregulated in schizophrenia. FDR<0.1 . . . . .                                                                                                                                                                                                                                                                                                                                                                                                                                      | 19 |
| 16 | Brain samples included in the meta-analysis. . . . .                                                                                                                                                                                                                                                                                                                                                                                                                                                                     | 21 |
| 17 | Blood samples included in the meta-analysis. . . . .                                                                                                                                                                                                                                                                                                                                                                                                                                                                     | 45 |
| 18 | a) Study design for samples from the cerebellum in GSE38322 and GSE28521. Samples that failed quality control tests were removed. We also collapsed technical replicates by obtaining the average expression of samples from the same individual.; b) Number of differentially expressed genes identified in the cerebellum. Sex-linked genes were removed from the GSE28521's results due to an imbalanced gender ratio in the study design; c) Differentially expressed genes in GSE28521. . . . .                     | 46 |



|              | <b>Tissue Type</b>                                      | <b>Tissue Source</b>     |
|--------------|---------------------------------------------------------|--------------------------|
| <b>Brain</b> |                                                         |                          |
| GSE28475     | Dorsal lateral prefrontal cortex, middle frontal gyrus  | HBTRC, NICHD             |
| GSE28521     | Frontal cortex (BA9), temporal cortex (BA41/42 or BA22) | ATP, HBB                 |
| GSE38322     | BA19                                                    | ATP, HBTRC, NICHD        |
| <b>Blood</b> |                                                         |                          |
| GSE6575      | Whole blood                                             | CHARGE                   |
| GSE7329      | Lymphoblastoid cell lines                               | AGRE                     |
| GSE15402     | Lymphoblastoid cell lines                               | AGRE                     |
| GSE15451     | Lymphoblastoid cell lines                               | AGRE                     |
| GSE18123.1   | Whole blood                                             | CHB, ACB                 |
| GSE18123.2   | Whole blood                                             | CHB, ACB                 |
| GSE25507     | Peripheral blood lymphocytes                            | Phoenix                  |
| GSE32136     | Lymphoblastoid cell lines                               | AGRE                     |
| GSE37772     | Lymphoblastoid cell lines                               | Simon Simplex Collection |

HBTRC: Harvard Brain Tissue Resource Centre.

NICHD: National Institute for Child Health and Human Development Brain and Tissue Bank.

ATP: Autism Tissue Program.

HBB: Harvard Brain Bank.

CHARGE: Childhood Autism Risks from Genetics and the Environment.

AGRE: Autism Genetic Resource Exchange.

CHB: Children's Hospital Boston.

ACB: Autism Consortium Boston.

Supplementary Table 1: Summary of tissue sources.

Supplementary Table 2: Summary of diagnosis criteria and ASD phenotypes in the original studies. Refer to Table 1 for study citations.

|              | <b>Diagnosis Criteria</b>                                                           | <b>Phenotypic descriptions</b>               |
|--------------|-------------------------------------------------------------------------------------|----------------------------------------------|
| <b>Brain</b> |                                                                                     |                                              |
| GSE28475     | ADI-R, ADOS, TARF, medical records                                                  | Autism                                       |
| GSE28521     | Available upon request, includes ADI-R diagnostic scores, AN-Brain Bank Case Number | Autism                                       |
| GSE38322     | ADI-R                                                                               | Autism                                       |
| <b>Blood</b> |                                                                                     |                                              |
| GSE6575      | DSM-IV, ADI-R, ADOS                                                                 | Autism no regression, autism with regression |
| GSE7329      | ADI-R, ADOS, Raven-IQ                                                               | ASD with dup(15q)                            |
| GSE15402     | ADI-R, Raven's score, Peabody Picture Vocabulary Test                               | ASD <sup>a</sup>                             |
| GSE15451     | ADI-R                                                                               | ASD <sup>b</sup>                             |
| GSE18123.1   | DSM-IV-TR, ADOS, ADI-R, comprehensive clinical testing                              | Autism, Asperger's Disorder, PDD-NOS         |
| GSE18123.2   | DSM-IV-TR, ADOS, ADI-R, comprehensive clinical testing                              | Autism, Asperger's Disorder, PDD-NOS         |
| GSE25507     | DSM-IV, ADOS, ADI-R                                                                 | classical autism                             |
| GSE32136     | -                                                                                   | ASD                                          |
| GSE37772     | Refer to the SFARI database for phenotype information                               | Autism                                       |

<sup>a</sup> Language, Mild, Savant (cluster analysis of ADI-R scores)

<sup>b</sup> severe language impairment (cluster analysis of ADI-R scores)

ADI-R: Autism Diagnostic Interview-Revised

ADOS: Autism Diagnostic Observation Schedule

TARF: The Autism Research Foundation

DSM-IV: Diagnostics and Statistical Manual of Mental Disorders IV, (TR: text revision)

SFARI: Simons Foundation Autism Research Initiative

(a)

| <b>Accession</b> | <b>Samples excluded</b>                                                                                                                                                                                             |
|------------------|---------------------------------------------------------------------------------------------------------------------------------------------------------------------------------------------------------------------|
| GSE6575          | Removed non ASD subjects with mental retardation or developmental delay.                                                                                                                                            |
| GSE7329          | Removed samples with a Fragile X (FMR1-FM) mutation. Remove samples in 2005 batch (scan date).                                                                                                                      |
| GSE15402         | Remove samples in batches not performed by user KyungS.                                                                                                                                                             |
| GSE15451         | Removed tissue samples that overlap with GSE32136 [Blood ID: HI0779, HI2022, HI2772, HI3143, HI3914, HI2044, HI2769, HI3144, HI4360, HI0777], as well as a subject that overlap with GSE15402 [Subject ID: AU0325]. |
| GSE18123.2       | Excluded samples without an assigned batch.                                                                                                                                                                         |
| GSE28475         | Excluded seizure samples, IVT assays. Excluded formalin-fixed samples. Removed samples that are also present in GSE38322 [Subject ID: UMB4670, UMB1860].                                                            |
| GSE28521         | Excluded samples from the cerebellum. Removed subjects that overlap with subjects in GSE38322 [Subject ID: AN19511, AN06420, AN08873, AN10833].                                                                     |
| GSE32136         | Excluded PPA/Propanol treated samples and samples in batch "bcmmes".                                                                                                                                                |
| GSE38322         | Excluded samples from the cerebellum.                                                                                                                                                                               |
| GSE37772         | Excluded samples from mothers.                                                                                                                                                                                      |

(b)

| <b>Datasets</b> | <b>Original Samples</b> | <b>Number Excluded</b> | <b>Number Failed QC</b> | <b>Remaining Samples</b> |
|-----------------|-------------------------|------------------------|-------------------------|--------------------------|
| <b>Brain</b>    |                         |                        |                         |                          |
| GSE28475        | 123                     | 63                     | 14                      | 34*                      |
| GSE28521        | 79                      | 25                     | 4                       | 27*                      |
| GSE38322        | 36                      | 26                     | 0                       | 10                       |
| <b>Blood</b>    |                         |                        |                         |                          |
| GSE6575         | 56                      | 9                      | 3                       | 44                       |
| GSE7329         | 30                      | 17                     | 0                       | 13                       |
| GSE15402        | 116                     | 10                     | 0                       | 106                      |
| GSE15451        | 38                      | 11                     | 0                       | 27                       |
| GSE18123.1      | 99                      | 0                      | 7                       | 92                       |
| GSE18123.2      | 186                     | 12                     | 18                      | 156                      |
| GSE25507        | 146                     | 0                      | 3                       | 143                      |
| GSE32136        | 23                      | 15                     | 0                       | 8                        |
| GSE37772        | 439                     | 3                      | 5                       | 431                      |

Supplementary Table 3: a) Samples excluded in each study; b) Summary statistics of samples removed. Asterisks denote data sets with technical replicates. The remaining samples comprise unique subjects only.

Supplementary Table 4: Demographics I - Gender. Gender imbalance is seen in some data sets, such as GSE37772. OR: Odds ratio.

| Datasets     | ASD  |        | Control |        | OR   | Total |
|--------------|------|--------|---------|--------|------|-------|
|              | Male | Female | Male    | Female |      |       |
| <b>Brain</b> |      |        |         |        |      |       |
| GSE28475     | 11   | 2      | 18      | 3      | 0.92 | 34    |
| GSE28521     | 8    | 4      | 14      | 1      | 0.14 | 27    |
| GSE38322     | 4    | 0      | 6       | 0      | -    | 10    |
| <b>Blood</b> |      |        |         |        |      |       |
| GSE6575      | 28   | 5      | 8       | 3      | 2.10 | 44    |
| GSE7329      | 7    | 0      | 6       | 0      | -    | 13    |
| GSE15402     | 77   | 0      | 29      | 0      | -    | 106   |
| GSE15451     | 15   | 0      | 12      | 0      | -    | 27    |
| GSE18123.1   | 64   | 0      | 28      | 0      | -    | 92    |
| GSE18123.2   | 72   | 21     | 30      | 33     | 3.80 | 156   |
| GSE25507     | 80   | 0      | 63      | 0      | -    | 143   |
| GSE32136     | 4    | 0      | 4       | 0      | -    | 8     |
| GSE37772     | 198  | 34     | 105     | 94     | 5.20 | 431   |

Supplementary Table 5: Demographics II - Age, PMI and race of subjects in each study.

| Datasets     | Age range (years) |            | PMI        |         | Race                                           |
|--------------|-------------------|------------|------------|---------|------------------------------------------------|
|              | ASD               | Control    | ASD        | Control |                                                |
| <b>Brain</b> |                   |            |            |         |                                                |
| GSE28475     | 2-56              | 3-56       | 4-43.25    | 5-36    | Caucasian, African American, unknown, mixed    |
| GSE28521     | 5-51              | 6.75-43.25 | 4.75-32.92 | 16-56   | Predominantly Caucasian, Asian                 |
| GSE38322     | 2-39              | 4-22.5     | 13-24.2    | 1-60    | White, unknown                                 |
| <b>Blood</b> |                   |            |            |         |                                                |
| GSE6575      | matched           | matched    | -          | -       | -                                              |
| GSE7329      | -                 | -          | -          | -       | -                                              |
| GSE15402     | 5-28              | 3-34       | -          | -       | Predominantly White, Asian, multi              |
| GSE15451     | 4-12              | 2-12       | -          | -       | Predominantly White, unknown                   |
| GSE18123.1   | 3,4-17.5          | 2.8-16     | -          | -       | Predominantly Caucasian, Asian, unknown, mixed |
| GSE18123.2   | 2-21              | 2.5-22     | -          | -       | Predominantly Caucasian, Asian, unknown, mixed |
| GSE25507     | 2-14              | 3-11       | -          | -       | Primarily Caucasian                            |
| GSE32136     | -                 | -          | -          | -       | -                                              |
| GSE37772     | 4-17.7            | 3-23.8     | -          | -       | Caucasian and non-caucasian                    |

Supplementary Table 6: Overlap between results reported in the literature and individual re-analysis of differential expression. Per dataset significant probes reported at FDR < 0.05. Gene symbols are used as a proxy for probes in GSE18123.1; GenBank accessions are used in GSE15451 and GSE15402; Spot IDs are used for GSE7329. GSE25507 computed differences in expression variance instead of differential expression; GSE37772 reported outlier genes instead of differentially expressed genes; GSE32136 is not published.

| <b>Datasets</b> | <b>Significant probes</b> | <b>Probes reported</b> | <b>Overlap</b> | <b>AUC</b> | <b>Precision(%)</b> |
|-----------------|---------------------------|------------------------|----------------|------------|---------------------|
| GSE15402        | 73                        | 530                    | 65             | 0.98       | 58.70               |
| GSE15451        | 0                         | 45                     | 0              | 0.86       | 1.58                |
| GSE18123.1      | 284                       | 489                    | 43             | 0.79       | 8.34                |
| GSE18123.2      | 69                        | 610                    | 43             | 0.92       | 31.00               |
| GSE25507        | -                         | -                      | -              | -          | -                   |
| GSE28475        | 0                         | 200                    | 0              | 0.89       | 6.94                |
| GSE28521        | 4                         | 588                    | 2              | 0.89       | 21.50               |
| GSE32136        | -                         | -                      | -              | -          | -                   |
| GSE37772        | -                         | -                      | -              | -          | -                   |
| GSE38322        | 0                         | 41                     | 0              | 0.98       | 6.84                |
| GSE6575         | 0                         | 55                     | 0              | 0.96       | 3.34                |
| GSE7329         | 596                       | 1281                   | 339            | 0.95       | 44.10               |

See spreadsheets attached.

Supplementary Table 7: Up-regulated meta-signature in brain.

Supplementary Table 8: Down-regulated meta-signature in brain.

Supplementary Table 9: Up-regulated meta-signature in blood.

Supplementary Table 10: Down-regulated meta-signature in blood.

| <b>Symbol</b> | <b>Name</b>                                                                       | <b>Meta p-value</b> |
|---------------|-----------------------------------------------------------------------------------|---------------------|
| UBE3A         | ubiquitin protein ligase E3A                                                      | 4.72E-06            |
| CDKL5         | cyclin-dependent kinase-like 5                                                    | 1.43E-03            |
| DMD           | dystrophin                                                                        | 2.36E-03            |
| SHANK3        | SH3 and multiple ankyrin repeat domains 3                                         | 6.58E-03            |
| HOXA1         | homeobox A1                                                                       | 1.45E-02            |
| PTEN          | phosphatase and tensin homolog                                                    | 2.34E-02            |
| TSC1          | tuberous sclerosis 1                                                              | 3.09E-02            |
| DHCR7         | 7-dehydrocholesterol reductase                                                    | 3.99E-02            |
| SCN1A         | sodium channel, voltage-gated, type I, alpha subunit                              | 7.29E-02            |
| AHI1          | Abelson helper integration site 1                                                 | 9.63E-02            |
| NF1           | neurofibromin 1                                                                   | 9.67E-02            |
| CACNA1C       | calcium channel, voltage-dependent, L type, alpha 1C subunit                      | 1.00E-01            |
| RAI1          | retinoic acid induced 1                                                           | 1.52E-01            |
| ALDH5A1       | aldehyde dehydrogenase 5 family, member A1                                        | 1.66E-01            |
| MECP2         | methyl CpG binding protein 2 (Rett syndrome)                                      | 2.12E-01            |
| ARX           | aristaless related homeobox                                                       | 2.21E-01            |
| SLC9A6        | solute carrier family 9, subfamily A (NHE6, cation proton antiporter 6), member 6 | 2.93E-01            |
| ADSL          | adenylosuccinate lyase                                                            | 3.27E-01            |
| DMPK          | dystrophia myotonica-protein kinase                                               | 3.50E-01            |

Supplementary Table 11: All genes and respective p-values in the SFARI syndromic category.



| <b>Gene Symbol</b> | <b>Gene Name</b>                                                                     | <b>Meta p-value</b> |
|--------------------|--------------------------------------------------------------------------------------|---------------------|
| ATP5O              | ATP synthase, H <sup>+</sup> transporting, mitochondrial F1 complex, O subunit       | 1.83E-05            |
| UQCRQ              | ubiquinol-cytochrome c reductase, complex III subunit VII, 9.5kDa                    | 5.45E-05            |
| UQCRC1             | ubiquinol-cytochrome c reductase core protein I                                      | 1.86E-04            |
| CYC1               | cytochrome c-1                                                                       | 2.90E-04            |
| COX5B              | cytochrome c oxidase subunit Vb                                                      | 2.98E-04            |
| NDUFA11            | NADH dehydrogenase (ubiquinone) 1 alpha subcomplex, 11, 14.7kDa                      | 4.38E-04            |
| ATP5L              | ATP synthase, H <sup>+</sup> transporting, mitochondrial Fo complex, subunit G       | 4.53E-04            |
| UQCR10             | ubiquinol-cytochrome c reductase, complex III subunit X                              | 4.53E-04            |
| UQCRC2             | ubiquinol-cytochrome c reductase core protein II                                     | 5.25E-04            |
| NDUFA13            | NADH dehydrogenase (ubiquinone) 1 alpha subcomplex, 13                               | 5.35E-04            |
| SLC25A12           | solute carrier family 25 (aspartate/glutamate carrier), member 12                    | 5.37E-04            |
| FH                 | fumarate hydratase                                                                   | 7.55E-04            |
| UQCR11             | ubiquinol-cytochrome c reductase, complex III subunit XI                             | 7.74E-04            |
| NDUFS4             | NADH dehydrogenase (ubiquinone) Fe-S protein 4, 18kDa<br>(NADH-coenzyme Q reductase) | 8.29E-04            |
| IDH3A              | isocitrate dehydrogenase 3 (NAD <sup>+</sup> ) alpha                                 | 9.06E-04            |

Supplementary Table 12: Top genes in the “cellular respiration” GO category at a meta-analysis raw p-value threshold of 0.0001. There are a total of 116 genes in this functional group.

See spreadsheets attached.

Supplementary Table 13: a) Comparisons between core signatures and lists of differentially expressed genes from original studies; b) Pairwise comparisons of original hits.

Supplementary Table 14: Dysregulated genes (FDR<0.05, meta-signature) within ASD-associated CNV. Fisher's exact test was used to compute significance. NS: Not significant.

|              | <b>Observed</b> |       | <b>Expected</b> |       | <b>Total</b> | <b>p-value</b> |
|--------------|-----------------|-------|-----------------|-------|--------------|----------------|
|              | n               | %     | n               | %     |              |                |
| <b>Brain</b> |                 |       |                 |       |              |                |
| Up           | 1               | 3.33  | 3               | 10.00 | 30           | NS             |
| Down         | 4               | 8.16  | 4               | 8.16  | 49           | NS             |
| Total        | 5               | 6.3   | 7               | 8.86  | 79           |                |
| <b>Blood</b> |                 |       |                 |       |              |                |
| Up           | 22              | 13.75 | 17              | 10.63 | 160          | 0.12           |
| Down         | 3               | 3.16  | 9               | 9.47  | 95           | NS             |
| Total        | 25              | 9.80  | 26              | 10.20 | 255          |                |

Supplementary Table 15: Meta-signature genes that are also dysregulated in schizophrenia. FDR<0.1

|                       | Genes    | P-Value  | FDR      |
|-----------------------|----------|----------|----------|
| <b>Up-regulated</b>   |          |          |          |
|                       | ABCA1    | 7.19e-05 | 4.16e-02 |
|                       | P4HA1    | 6.83e-04 | 9.19e-02 |
| <b>Down-regulated</b> |          |          |          |
|                       | CCDC25   | 2.59e-05 | 3.27e-02 |
|                       | LRRRC17  | 3.06e-04 | 5.77e-02 |
|                       | RMND5B   | 4.30e-04 | 6.09e-02 |
|                       | SLC25A12 | 5.37e-04 | 6.57e-02 |
|                       | FARSA    | 8.45e-04 | 7.78e-02 |
|                       | PPA2     | 9.61e-04 | 8.26e-02 |
|                       | APBA2    | 1.11e-03 | 9.01e-02 |

| <b>Data Set</b> | <b>Sample ID</b> | <b>Source</b>     |
|-----------------|------------------|-------------------|
| GSE28521        | AN11989          | ATP, HBB          |
| GSE28521        | AN12457          | ATP, HBB          |
| GSE28521        | AN16115          | ATP, HBB          |
| GSE28521        | AN16641          | ATP, HBB          |
| GSE28521        | AN17138          | ATP, HBB          |
| GSE28521        | AN17254          | ATP, HBB          |
| GSE28521        | AN17777          | ATP, HBB          |
| GSE28521        | AN01570          | ATP, HBB          |
| GSE28521        | AN08166          | ATP, HBB          |
| GSE28521        | AN08792          | ATP, HBB          |
| GSE28521        | AN00493          | ATP, HBB          |
| GSE28521        | AN00764          | ATP, HBB          |
| GSE28521        | AN10028          | ATP, HBB          |
| GSE28521        | AN12137          | ATP, HBB          |
| GSE28521        | AN12240          | ATP, HBB          |
| GSE28521        | AN14757          | ATP, HBB          |
| GSE28521        | AN15566          | ATP, HBB          |
| GSE28521        | AN17425          | ATP, HBB          |
| GSE28521        | AN19442          | ATP, HBB          |
| GSE28521        | AN19760          | ATP, HBB          |
| GSE28521        | AN01125          | ATP, HBB          |
| GSE28521        | AN01410          | ATP, HBB          |
| GSE28521        | AN03217          | ATP, HBB          |
| GSE28521        | AN04479          | ATP, HBB          |
| GSE28521        | AN07176          | ATP, HBB          |
| GSE28521        | AN00142          | ATP, HBB          |
| GSE28521        | AN00544          | ATP, HBB          |
| GSE38322        | AN10723          | ATP, HBTRC, NICHD |
| GSE38322        | AN06420          | ATP, HBTRC, NICHD |
| GSE38322        | AN03345          | ATP, HBTRC, NICHD |
| GSE38322        | AN08873          | ATP, HBTRC, NICHD |
| GSE38322        | AN10833          | ATP, HBTRC, NICHD |
| GSE38322        | UMB4670          | ATP, HBTRC, NICHD |
| GSE38322        | BTB1453          | ATP, HBTRC, NICHD |
| GSE38322        | BTB3228          | ATP, HBTRC, NICHD |
| GSE38322        | UMB4543          | ATP, HBTRC, NICHD |
| GSE38322        | AN19511          | ATP, HBTRC, NICHD |
| GSE28475        | UMB797           | HBTRC, NICHD      |
| GSE28475        | UMB1674          | HBTRC, NICHD      |
| GSE28475        | B6756            | HBTRC, NICHD      |
| GSE28475        | B5873            | HBTRC, NICHD      |
| GSE28475        | UMB1349          | HBTRC, NICHD      |
| GSE28475        | UMB1796          | HBTRC, NICHD      |
| GSE28475        | UMB4231          | HBTRC, NICHD      |

Continued...

| <b>Data Set</b> | <b>Sample ID</b> | <b>Source</b> |
|-----------------|------------------|---------------|
| GSE28475        | B5334            | HBTRC, NICHD  |
| GSE28475        | B5251            | HBTRC, NICHD  |
| GSE28475        | B5352            | HBTRC, NICHD  |
| GSE28475        | B6736            | HBTRC, NICHD  |
| GSE28475        | B7109            | HBTRC, NICHD  |
| GSE28475        | B7085            | HBTRC, NICHD  |
| GSE28475        | B5813            | HBTRC, NICHD  |
| GSE28475        | B6677            | HBTRC, NICHD  |
| GSE28475        | B4756            | HBTRC, NICHD  |
| GSE28475        | B7079            | HBTRC, NICHD  |
| GSE28475        | B6860            | HBTRC, NICHD  |
| GSE28475        | B5666            | HBTRC, NICHD  |
| GSE28475        | B6399            | HBTRC, NICHD  |
| GSE28475        | UMB4849          | HBTRC, NICHD  |
| GSE28475        | UMB4722          | HBTRC, NICHD  |
| GSE28475        | UMB4899          | HBTRC, NICHD  |
| GSE28475        | B1469            | HBTRC, NICHD  |
| GSE28475        | UMB1185          | HBTRC, NICHD  |
| GSE28475        | UMB1714          | HBTRC, NICHD  |
| GSE28475        | UMB4787          | HBTRC, NICHD  |
| GSE28475        | UMB1377          | HBTRC, NICHD  |
| GSE28475        | UMB818           | HBTRC, NICHD  |
| GSE28475        | UMB1649          | HBTRC, NICHD  |
| GSE28475        | UMB1499          | HBTRC, NICHD  |
| GSE28475        | UMB4898          | HBTRC, NICHD  |
| GSE28475        | UMB4671          | HBTRC, NICHD  |
| GSE28475        | UMB1650          | HBTRC, NICHD  |

Supplementary Table 16: Brain samples included in the meta-analysis.

| Data Set | Individual ID | Sample ID | Source |
|----------|---------------|-----------|--------|
| GSE7329  | 01-19         | -         | AGRE   |
| GSE7329  | 02-07         | -         | AGRE   |
| GSE7329  | 03-43         | -         | AGRE   |
| GSE7329  | 98-19         | -         | AGRE   |
| GSE7329  | AU006504      | -         | AGRE   |
| GSE7329  | AU010603      | -         | AGRE   |
| GSE7329  | AU010604      | -         | AGRE   |
| GSE7329  | AU016703      | -         | AGRE   |
| GSE7329  | AU060003      | -         | AGRE   |
| GSE7329  | AU081206      | -         | AGRE   |
| GSE7329  | AU0943303     | -         | AGRE   |
| GSE7329  | AU0995302     | -         | AGRE   |
| GSE7329  | AU1038304     | -         | AGRE   |
| GSE32136 | -             | HI0779    | AGRE   |
| GSE32136 | -             | HI2772    | AGRE   |
| GSE32136 | -             | HI3143    | AGRE   |
| GSE32136 | -             | HI3914    | AGRE   |
| GSE32136 | -             | HI2044    | AGRE   |
| GSE32136 | -             | HI2769    | AGRE   |
| GSE32136 | -             | HI3144    | AGRE   |
| GSE32136 | -             | HI4360    | AGRE   |
| GSE15451 | AU014504      | HI0487    | AGRE   |
| GSE15451 | AU014506      | HI0488    | AGRE   |
| GSE15451 | AU014505      | HI0489    | AGRE   |
| GSE15451 | AU022703      | HI0354    | AGRE   |
| GSE15451 | AU022705      | HI0355    | AGRE   |
| GSE15451 | AU022704      | HI0356    | AGRE   |
| GSE15451 | AU032505      | HI0364    | AGRE   |
| GSE15451 | AU032504      | HI0366    | AGRE   |
| GSE15451 | AU1059302     | HI3141    | AGRE   |
| GSE15451 | AU010806      | HI0735    | AGRE   |
| GSE15451 | AU010803      | HI0737    | AGRE   |
| GSE15451 | AU046504      | HI0781    | AGRE   |
| GSE15451 | AU046503      | HI0785    | AGRE   |
| GSE15451 | AU055504      | HI0802    | AGRE   |
| GSE15451 | AU055506      | HI3168    | AGRE   |
| GSE15451 | AU080805      | HI2019    | AGRE   |
| GSE15451 | AU080804      | HI2020    | AGRE   |
| GSE15451 | AU0939302     | HI2590    | AGRE   |
| GSE15451 | AU0939303     | HI2591    | AGRE   |
| GSE15451 | AU1327305     | HI3299    | AGRE   |
| GSE15451 | AU1327303     | HI3301    | AGRE   |
| GSE15451 | AU1244302     | HI3649    | AGRE   |
| GSE15451 | AU1244301     | HI3650    | AGRE   |

Continued...

| <b>Data Set</b> | <b>Individual ID</b> | <b>Sample ID</b> | <b>Source</b> |
|-----------------|----------------------|------------------|---------------|
| GSE15451        | AU1181302            | HI3913           | AGRE          |
| GSE15451        | AU1443302            | HI4107           | AGRE          |
| GSE15451        | AU1443304            | HI4109           | AGRE          |
| GSE15451        | AU1234304            | HI4359           | AGRE          |
| GSE15402        | AU1156303            | HI4004           | AGRE          |
| GSE15402        | AU1417301            | HI3673           | AGRE          |
| GSE15402        | AU1204302            | HI2983           | AGRE          |
| GSE15402        | AU1339302            | HI3369           | AGRE          |
| GSE15402        | AU0883301            | HI3323           | AGRE          |
| GSE15402        | AU0905301            | HI2427           | AGRE          |
| GSE15402        | AU0997302            | HI2779           | AGRE          |
| GSE15402        | AU073107             | HI1367           | AGRE          |
| GSE15402        | AU0920301            | HI2402           | AGRE          |
| GSE15402        | AU1327304            | HI3303           | AGRE          |
| GSE15402        | AU1409301            | HI3599           | AGRE          |
| GSE15402        | AU072504             | HI1657           | AGRE          |
| GSE15402        | AU1196302            | HI3522           | AGRE          |
| GSE15402        | AU1405303            | HI4516           | AGRE          |
| GSE15402        | AU015003             | HI0591           | AGRE          |
| GSE15402        | AU062203             | HI1943           | AGRE          |
| GSE15402        | AU0941301            | HI2532           | AGRE          |
| GSE15402        | AU1078302            | HI2687           | AGRE          |
| GSE15402        | AU017504             | HI0266           | AGRE          |
| GSE15402        | AU028905             | HI0110           | AGRE          |
| GSE15402        | AU051504             | HI0792           | AGRE          |
| GSE15402        | AU079103             | HI1861           | AGRE          |
| GSE15402        | AU0934301            | HI2536           | AGRE          |
| GSE15402        | AU0997301            | HI2781           | AGRE          |
| GSE15402        | AU1047312            | HI2683           | AGRE          |
| GSE15402        | AU1261301            | HI3118           | AGRE          |
| GSE15402        | AU1270301            | HI3290           | AGRE          |
| GSE15402        | AU041904             | HI0649           | AGRE          |
| GSE15402        | AU025005             | HI0050           | AGRE          |
| GSE15402        | AU015903             | HI0928           | AGRE          |
| GSE15402        | AU1652301            | HI4820           | AGRE          |
| GSE15402        | AU1546302            | HI4341           | AGRE          |
| GSE15402        | AU1067301            | HI3424           | AGRE          |
| GSE15402        | AU1332302            | HI3470           | AGRE          |
| GSE15402        | AU1685302            | HI4838           | AGRE          |
| GSE15402        | AU1397301            | HI3660           | AGRE          |
| GSE15402        | AU1648301            | HI4751           | AGRE          |
| GSE15402        | AU053504             | HI1495           | AGRE          |
| GSE15402        | AU056604             | HI1234           | AGRE          |
| GSE15402        | AU1174301            | HI2853           | AGRE          |

Continued...

| <b>Data Set</b> | <b>Individual ID</b> | <b>Sample ID</b> | <b>Source</b> |
|-----------------|----------------------|------------------|---------------|
| GSE15402        | AU0943302            | HI2576           | AGRE          |
| GSE15402        | AU1047302            | HI2680           | AGRE          |
| GSE15402        | AU1097301            | HI2905           | AGRE          |
| GSE15402        | AU073804             | HI2251           | AGRE          |
| GSE15402        | AU1182302            | HI2846           | AGRE          |
| GSE15402        | AU024004             | HI1364           | AGRE          |
| GSE15402        | AU1056301            | HI4420           | AGRE          |
| GSE15402        | AU0962301            | HI2609           | AGRE          |
| GSE15402        | AU1069301            | HI2828           | AGRE          |
| GSE15402        | AU1182301            | HI2835           | AGRE          |
| GSE15402        | AU1196301            | HI4870           | AGRE          |
| GSE15402        | AU1520301            | HI4002           | AGRE          |
| GSE15402        | AU081203             | HI2028           | AGRE          |
| GSE15402        | AU1008302            | HI4461           | AGRE          |
| GSE15402        | AU016803             | HI1492           | AGRE          |
| GSE15402        | AU1025301            | HI3379           | AGRE          |
| GSE15402        | AU0955303            | HI2791           | AGRE          |
| GSE15402        | AU1102303            | HI2824           | AGRE          |
| GSE15402        | AU005215             | HI1276           | AGRE          |
| GSE15402        | AU083604             | HI2163           | AGRE          |
| GSE15402        | AU005214             | HI1279           | AGRE          |
| GSE15402        | AU029803             | HI0624           | AGRE          |
| GSE15402        | AU080403             | HI2039           | AGRE          |
| GSE15402        | AU048103             | HI1555           | AGRE          |
| GSE15402        | AU1048301            | HI2679           | AGRE          |
| GSE15402        | AU067703             | HI2008           | AGRE          |
| GSE15402        | AU1007302            | HI2706           | AGRE          |
| GSE15402        | AU1164302            | HI2883           | AGRE          |
| GSE15402        | AU069604             | HI1428           | AGRE          |
| GSE15402        | AU1498302            | HI4185           | AGRE          |
| GSE15402        | AU0917302            | HI2530           | AGRE          |
| GSE15402        | AU1048302            | HI2677           | AGRE          |
| GSE15402        | AU1102301            | HI2815           | AGRE          |
| GSE15402        | AU045004             | HI0570           | AGRE          |
| GSE15402        | AU1494302            | HI4196           | AGRE          |
| GSE15402        | AU007605             | HI0217           | AGRE          |
| GSE15402        | AU005303             | HI1102           | AGRE          |
| GSE15402        | AU070808             | HI1911           | AGRE          |
| GSE15402        | AU069606             | HI4281           | AGRE          |
| GSE15402        | AU0903303            | HI2442           | AGRE          |
| GSE15402        | AU1346304            | HI3987           | AGRE          |
| GSE15402        | AU083605             | HI2162           | AGRE          |
| GSE15402        | AU1429304            | HI4090           | AGRE          |
| GSE15402        | AU059407             | HI1534           | AGRE          |

Continued...



| <b>Data Set</b> | <b>Individual ID</b> | <b>Sample ID</b> | <b>Source</b> |
|-----------------|----------------------|------------------|---------------|
| GSE15402        | AU007505             | HI0742           | AGRE          |
| GSE15402        | AU1135203            | HI2725           | AGRE          |
| GSE15402        | AU1331304            | HI3304           | AGRE          |
| GSE15402        | AU045012             | HI1866           | AGRE          |
| GSE15402        | AU1007301            | HI2705           | AGRE          |
| GSE15402        | AU1283302            | HI3216           | AGRE          |
| GSE15402        | AU020105             | HI0507           | AGRE          |
| GSE15402        | AU059406             | HI1537           | AGRE          |
| GSE15402        | AU059405             | HI1535           | AGRE          |
| GSE15402        | AU061405             | HI1545           | AGRE          |
| GSE15402        | AU1135201            | HI2723           | AGRE          |
| GSE15402        | AU053304             | HI1788           | AGRE          |
| GSE15402        | AU057903             | HI0813           | AGRE          |
| GSE15402        | AU001504             | HI1693           | AGRE          |
| GSE15402        | AU059403             | HI1539           | AGRE          |
| GSE15402        | AU019404             | HI1047           | AGRE          |
| GSE15402        | AU032503             | HI0365           | AGRE          |
| GSE15402        | AU077503             | HI1706           | AGRE          |
| GSE15402        | AU0885304            | HI2357           | AGRE          |
| GSE15402        | AU0885301            | HI2356           | AGRE          |
| GSE15402        | AU005605             | HI0614           | AGRE          |
| GSE15402        | AU062903             | HI1161           | AGRE          |
| GSE6575         | whole blood_100683   | -                | CHARGE        |
| GSE6575         | whole blood_101291   | -                | CHARGE        |
| GSE6575         | whole blood_100923   | -                | CHARGE        |
| GSE6575         | whole blood_100652   | -                | CHARGE        |
| GSE6575         | whole blood_101584   | -                | CHARGE        |
| GSE6575         | whole blood_100676   | -                | CHARGE        |
| GSE6575         | whole blood_100812   | -                | CHARGE        |
| GSE6575         | whole blood_101007   | -                | CHARGE        |
| GSE6575         | whole blood_101611   | -                | CHARGE        |
| GSE6575         | whole blood_101832   | -                | CHARGE        |
| GSE6575         | whole blood_101094   | -                | CHARGE        |
| GSE6575         | whole blood_100537   | -                | CHARGE        |
| GSE6575         | whole blood_101369   | -                | CHARGE        |
| GSE6575         | whole blood_100603   | -                | CHARGE        |
| GSE6575         | whole blood_100309   | -                | CHARGE        |
| GSE6575         | whole blood_100476   | -                | CHARGE        |
| GSE6575         | whole blood_100247   | -                | CHARGE        |
| GSE6575         | whole blood_101592   | -                | CHARGE        |
| GSE6575         | whole blood_101025   | -                | CHARGE        |
| GSE6575         | whole blood_100214   | -                | CHARGE        |
| GSE6575         | whole blood_101060   | -                | CHARGE        |
| GSE6575         | whole blood_101062   | -                | CHARGE        |

Continued...

| Data Set | Individual ID      | Sample ID | Source |
|----------|--------------------|-----------|--------|
| GSE6575  | whole blood_101209 | -         | CHARGE |
| GSE6575  | whole blood_100823 | -         | CHARGE |
| GSE6575  | whole blood_101234 | -         | CHARGE |
| GSE6575  | whole blood_100716 | -         | CHARGE |
| GSE6575  | whole blood_101700 | -         | CHARGE |
| GSE6575  | whole blood_102321 | -         | CHARGE |
| GSE6575  | whole blood_101669 | -         | CHARGE |
| GSE6575  | whole blood_100158 | -         | CHARGE |
| GSE6575  | whole blood_101682 | -         | CHARGE |
| GSE6575  | whole blood_100278 | -         | CHARGE |
| GSE6575  | whole blood_100416 | -         | CHARGE |
| GSE6575  | whole blood_100981 | -         | CHARGE |
| GSE6575  | whole blood_101339 | -         | CHARGE |
| GSE6575  | whole blood_101644 | -         | CHARGE |
| GSE6575  | whole blood_100354 | -         | CHARGE |
| GSE6575  | whole blood_101074 | -         | CHARGE |
| GSE6575  | whole blood_101467 | -         | CHARGE |
| GSE6575  | whole blood_101726 | -         | CHARGE |
| GSE6575  | whole blood_100409 | -         | CHARGE |
| GSE6575  | whole blood_101794 | -         | CHARGE |
| GSE6575  | whole blood_100374 | -         | CHARGE |
| GSE6575  | whole blood_100190 | -         | CHARGE |
| GSE37772 | 12032.p1           | -         | SSC    |
| GSE37772 | 11201.s1           | -         | SSC    |
| GSE37772 | 12219.p1           | -         | SSC    |
| GSE37772 | 12117.s1           | -         | SSC    |
| GSE37772 | 12007.p1           | -         | SSC    |
| GSE37772 | 12235.p1           | -         | SSC    |
| GSE37772 | 12295.s1           | -         | SSC    |
| GSE37772 | 12457.s1           | -         | SSC    |
| GSE37772 | 11041.p1           | -         | SSC    |
| GSE37772 | 11435.p1           | -         | SSC    |
| GSE37772 | 11696.p1           | -         | SSC    |
| GSE37772 | 11129.p1           | -         | SSC    |
| GSE37772 | 11090.p1           | -         | SSC    |
| GSE37772 | 11433.p1           | -         | SSC    |
| GSE37772 | 12647.p1           | -         | SSC    |
| GSE37772 | 12435.p1           | -         | SSC    |
| GSE37772 | 12736.p1           | -         | SSC    |
| GSE37772 | 12512.p1           | -         | SSC    |
| GSE37772 | 12984.p1           | -         | SSC    |
| GSE37772 | 12958.p1           | -         | SSC    |
| GSE37772 | 13128.p1           | -         | SSC    |
| GSE37772 | 13195.p1           | -         | SSC    |

Continued...

| Data Set | Individual ID | Sample ID | Source |
|----------|---------------|-----------|--------|
| GSE37772 | 11387.p1      | -         | SSC    |
| GSE37772 | 11343.p1      | -         | SSC    |
| GSE37772 | 11809.p1      | -         | SSC    |
| GSE37772 | 11080.p1      | -         | SSC    |
| GSE37772 | 11689.p1      | -         | SSC    |
| GSE37772 | 11962.p1      | -         | SSC    |
| GSE37772 | 11962.s1      | -         | SSC    |
| GSE37772 | 11824.s1      | -         | SSC    |
| GSE37772 | 12239.p1      | -         | SSC    |
| GSE37772 | 12339.p1      | -         | SSC    |
| GSE37772 | 12383.p1      | -         | SSC    |
| GSE37772 | 12343.p1      | -         | SSC    |
| GSE37772 | 12351.s1      | -         | SSC    |
| GSE37772 | 12685.p1      | -         | SSC    |
| GSE37772 | 12451.p1      | -         | SSC    |
| GSE37772 | 12581.p1      | -         | SSC    |
| GSE37772 | 12297.p1      | -         | SSC    |
| GSE37772 | 12299.s1      | -         | SSC    |
| GSE37772 | 11532.p1      | -         | SSC    |
| GSE37772 | 11334.p1      | -         | SSC    |
| GSE37772 | 11135.p1      | -         | SSC    |
| GSE37772 | 11390.p1      | -         | SSC    |
| GSE37772 | 11629.p1      | -         | SSC    |
| GSE37772 | 11680.p1      | -         | SSC    |
| GSE37772 | 12100.p1      | -         | SSC    |
| GSE37772 | 12308.p1      | -         | SSC    |
| GSE37772 | 12417.p1      | -         | SSC    |
| GSE37772 | 12594.p1      | -         | SSC    |
| GSE37772 | 11868.p1      | -         | SSC    |
| GSE37772 | 11868.s1      | -         | SSC    |
| GSE37772 | 12014.p1      | -         | SSC    |
| GSE37772 | 12014.s1      | -         | SSC    |
| GSE37772 | 12523.p1      | -         | SSC    |
| GSE37772 | 12523.s1      | -         | SSC    |
| GSE37772 | 12603.p1      | -         | SSC    |
| GSE37772 | 12603.s1      | -         | SSC    |
| GSE37772 | 11610.p1      | -         | SSC    |
| GSE37772 | 11610.s1      | -         | SSC    |
| GSE37772 | 11407.p1      | -         | SSC    |
| GSE37772 | 11407.s1      | -         | SSC    |
| GSE37772 | 11879.p1      | -         | SSC    |
| GSE37772 | 11736.p1      | -         | SSC    |
| GSE37772 | 11356.s1      | -         | SSC    |
| GSE37772 | 11066.p1      | -         | SSC    |

Continued...

| Data Set | Individual ID | Sample ID | Source |
|----------|---------------|-----------|--------|
| GSE37772 | 11066.s1      | -         | SSC    |
| GSE37772 | 11254.p1      | -         | SSC    |
| GSE37772 | 11254.s1      | -         | SSC    |
| GSE37772 | 11484.p1      | -         | SSC    |
| GSE37772 | 11484.s1      | -         | SSC    |
| GSE37772 | 11480.p1      | -         | SSC    |
| GSE37772 | 12048.s1      | -         | SSC    |
| GSE37772 | 12184.s1      | -         | SSC    |
| GSE37772 | 12399.s1      | -         | SSC    |
| GSE37772 | 12385.p1      | -         | SSC    |
| GSE37772 | 12385.s1      | -         | SSC    |
| GSE37772 | 12420.s1      | -         | SSC    |
| GSE37772 | 12327.p1      | -         | SSC    |
| GSE37772 | 12420.p1      | -         | SSC    |
| GSE37772 | 12279.p1      | -         | SSC    |
| GSE37772 | 11948.s1      | -         | SSC    |
| GSE37772 | 12346.s1      | -         | SSC    |
| GSE37772 | 12279.s1      | -         | SSC    |
| GSE37772 | 12297.s1      | -         | SSC    |
| GSE37772 | 12048.p1      | -         | SSC    |
| GSE37772 | 12399.p1      | -         | SSC    |
| GSE37772 | 11998.p1      | -         | SSC    |
| GSE37772 | 11998.s1      | -         | SSC    |
| GSE37772 | 12096.p1      | -         | SSC    |
| GSE37772 | 12096.s1      | -         | SSC    |
| GSE37772 | 12015.p1      | -         | SSC    |
| GSE37772 | 12015.s1      | -         | SSC    |
| GSE37772 | 11839.p1      | -         | SSC    |
| GSE37772 | 11718.p1      | -         | SSC    |
| GSE37772 | 12078.s1      | -         | SSC    |
| GSE37772 | 12073.p1      | -         | SSC    |
| GSE37772 | 12073.s1      | -         | SSC    |
| GSE37772 | 11979.p1      | -         | SSC    |
| GSE37772 | 11979.s1      | -         | SSC    |
| GSE37772 | 11990.p1      | -         | SSC    |
| GSE37772 | 11990.s1      | -         | SSC    |
| GSE37772 | 12044.p1      | -         | SSC    |
| GSE37772 | 11540.p1      | -         | SSC    |
| GSE37772 | 11540.s1      | -         | SSC    |
| GSE37772 | 11267.p1      | -         | SSC    |
| GSE37772 | 11274.p1      | -         | SSC    |
| GSE37772 | 11274.s1      | -         | SSC    |
| GSE37772 | 11247.p1      | -         | SSC    |
| GSE37772 | 11247.s1      | -         | SSC    |

Continued...

| Data Set | Individual ID | Sample ID | Source |
|----------|---------------|-----------|--------|
| GSE37772 | 11356.p1      | -         | SSC    |
| GSE37772 | 11625.s1      | -         | SSC    |
| GSE37772 | 11947.s1      | -         | SSC    |
| GSE37772 | 11177.p1      | -         | SSC    |
| GSE37772 | 11333.p1      | -         | SSC    |
| GSE37772 | 11333.s1      | -         | SSC    |
| GSE37772 | 11495.p1      | -         | SSC    |
| GSE37772 | 11495.s1      | -         | SSC    |
| GSE37772 | 11267.s1      | -         | SSC    |
| GSE37772 | 12261.s1      | -         | SSC    |
| GSE37772 | 12044.s1      | -         | SSC    |
| GSE37772 | 12241.p1      | -         | SSC    |
| GSE37772 | 12241.s1      | -         | SSC    |
| GSE37772 | 12184.p1      | -         | SSC    |
| GSE37772 | 11948.p1      | -         | SSC    |
| GSE37772 | 12224.p1      | -         | SSC    |
| GSE37772 | 12261.p1      | -         | SSC    |
| GSE37772 | 11839.s1      | -         | SSC    |
| GSE37772 | 11718.s1      | -         | SSC    |
| GSE37772 | 11831.p1      | -         | SSC    |
| GSE37772 | 11831.s1      | -         | SSC    |
| GSE37772 | 12083.p1      | -         | SSC    |
| GSE37772 | 12083.s1      | -         | SSC    |
| GSE37772 | 12078.p1      | -         | SSC    |
| GSE37772 | 11276.p1      | -         | SSC    |
| GSE37772 | 11276.s1      | -         | SSC    |
| GSE37772 | 11765.p1      | -         | SSC    |
| GSE37772 | 11765.s1      | -         | SSC    |
| GSE37772 | 11723.p1      | -         | SSC    |
| GSE37772 | 11723.s1      | -         | SSC    |
| GSE37772 | 11731.p1      | -         | SSC    |
| GSE37772 | 11731.s1      | -         | SSC    |
| GSE37772 | 11736.s1      | -         | SSC    |
| GSE37772 | 11879.s1      | -         | SSC    |
| GSE37772 | 11393.p1      | -         | SSC    |
| GSE37772 | 11393.s1      | -         | SSC    |
| GSE37772 | 11857.p1      | -         | SSC    |
| GSE37772 | 11857.s1      | -         | SSC    |
| GSE37772 | 11634.p1      | -         | SSC    |
| GSE37772 | 11634.s1      | -         | SSC    |
| GSE37772 | 11006.p1      | -         | SSC    |
| GSE37772 | 11006.s1      | -         | SSC    |
| GSE37772 | 11554.p1      | -         | SSC    |
| GSE37772 | 11554.s1      | -         | SSC    |

Continued...

| Data Set | Individual ID | Sample ID | Source |
|----------|---------------|-----------|--------|
| GSE37772 | 11342.p1      | -         | SSC    |
| GSE37772 | 11342.s1      | -         | SSC    |
| GSE37772 | 11113.s1      | -         | SSC    |
| GSE37772 | 11113.p1      | -         | SSC    |
| GSE37772 | 11220.s1      | -         | SSC    |
| GSE37772 | 11114.s1      | -         | SSC    |
| GSE37772 | 11220.p1      | -         | SSC    |
| GSE37772 | 11114.p1      | -         | SSC    |
| GSE37772 | 11489.s1      | -         | SSC    |
| GSE37772 | 11482.p1      | -         | SSC    |
| GSE37772 | 11076.s1      | -         | SSC    |
| GSE37772 | 11076.p1      | -         | SSC    |
| GSE37772 | 11089.p1      | -         | SSC    |
| GSE37772 | 11550.s1      | -         | SSC    |
| GSE37772 | 11156.p1      | -         | SSC    |
| GSE37772 | 11399.p1      | -         | SSC    |
| GSE37772 | 11323.p1      | -         | SSC    |
| GSE37772 | 11284.s1      | -         | SSC    |
| GSE37772 | 11325.s1      | -         | SSC    |
| GSE37772 | 11284.p1      | -         | SSC    |
| GSE37772 | 11325.p1      | -         | SSC    |
| GSE37772 | 11193.p1      | -         | SSC    |
| GSE37772 | 11193.s1      | -         | SSC    |
| GSE37772 | 11428.s1      | -         | SSC    |
| GSE37772 | 11328.s1      | -         | SSC    |
| GSE37772 | 11046.s1      | -         | SSC    |
| GSE37772 | 11502.p1      | -         | SSC    |
| GSE37772 | 11091.s1      | -         | SSC    |
| GSE37772 | 11208.s1      | -         | SSC    |
| GSE37772 | 11004.s1      | -         | SSC    |
| GSE37772 | 11502.s1      | -         | SSC    |
| GSE37772 | 11376.p1      | -         | SSC    |
| GSE37772 | 11265.p1      | -         | SSC    |
| GSE37772 | 11376.s1      | -         | SSC    |
| GSE37772 | 11291.p1      | -         | SSC    |
| GSE37772 | 11285.s1      | -         | SSC    |
| GSE37772 | 11197.p1      | -         | SSC    |
| GSE37772 | 11479.p1      | -         | SSC    |
| GSE37772 | 11411.s1      | -         | SSC    |
| GSE37772 | 11216.p1      | -         | SSC    |
| GSE37772 | 11216.s1      | -         | SSC    |
| GSE37772 | 11057.p1      | -         | SSC    |
| GSE37772 | 11005.p1      | -         | SSC    |
| GSE37772 | 11499.p1      | -         | SSC    |

Continued...

| Data Set | Individual ID | Sample ID | Source |
|----------|---------------|-----------|--------|
| GSE37772 | 11316.s1      | -         | SSC    |
| GSE37772 | 11316.p1      | -         | SSC    |
| GSE37772 | 11053.s1      | -         | SSC    |
| GSE37772 | 11406.s1      | -         | SSC    |
| GSE37772 | 11053.p1      | -         | SSC    |
| GSE37772 | 11519.s1      | -         | SSC    |
| GSE37772 | 11207.p1      | -         | SSC    |
| GSE37772 | 11207.s1      | -         | SSC    |
| GSE37772 | 11300.p1      | -         | SSC    |
| GSE37772 | 11300.s1      | -         | SSC    |
| GSE37772 | 11501.p1      | -         | SSC    |
| GSE37772 | 11501.s1      | -         | SSC    |
| GSE37772 | 11192.s1      | -         | SSC    |
| GSE37772 | 11102.p1      | -         | SSC    |
| GSE37772 | 11083.p1      | -         | SSC    |
| GSE37772 | 11301.p1      | -         | SSC    |
| GSE37772 | 11219.s1      | -         | SSC    |
| GSE37772 | 11551.s1      | -         | SSC    |
| GSE37772 | 11219.p1      | -         | SSC    |
| GSE37772 | 11551.p1      | -         | SSC    |
| GSE37772 | 11191.p1      | -         | SSC    |
| GSE37772 | 11180.s1      | -         | SSC    |
| GSE37772 | 11578.p1      | -         | SSC    |
| GSE37772 | 11062.p1      | -         | SSC    |
| GSE37772 | 11510.s1      | -         | SSC    |
| GSE37772 | 11062.s1      | -         | SSC    |
| GSE37772 | 11469.p1      | -         | SSC    |
| GSE37772 | 11579.p1      | -         | SSC    |
| GSE37772 | 11293.p1      | -         | SSC    |
| GSE37772 | 11293.s1      | -         | SSC    |
| GSE37772 | 11071.s1      | -         | SSC    |
| GSE37772 | 11071.p1      | -         | SSC    |
| GSE37772 | 11073.p1      | -         | SSC    |
| GSE37772 | 11073.s1      | -         | SSC    |
| GSE37772 | 11186.p1      | -         | SSC    |
| GSE37772 | 11186.s1      | -         | SSC    |
| GSE37772 | 11509.p1      | -         | SSC    |
| GSE37772 | 11509.s1      | -         | SSC    |
| GSE37772 | 11452.p1      | -         | SSC    |
| GSE37772 | 11452.s1      | -         | SSC    |
| GSE37772 | 11059.p1      | -         | SSC    |
| GSE37772 | 11459.p1      | -         | SSC    |
| GSE37772 | 11285.p1      | -         | SSC    |
| GSE37772 | 11075.p1      | -         | SSC    |

Continued...

| Data Set | Individual ID | Sample ID | Source |
|----------|---------------|-----------|--------|
| GSE37772 | 11557.s1      | -         | SSC    |
| GSE37772 | 11075.s1      | -         | SSC    |
| GSE37772 | 11546.p1      | -         | SSC    |
| GSE37772 | 11546.s1      | -         | SSC    |
| GSE37772 | 11577.p1      | -         | SSC    |
| GSE37772 | 11577.s1      | -         | SSC    |
| GSE37772 | 11417.p1      | -         | SSC    |
| GSE37772 | 11411.p1      | -         | SSC    |
| GSE37772 | 11197.s1      | -         | SSC    |
| GSE37772 | 11625.p1      | -         | SSC    |
| GSE37772 | 11233.p1      | -         | SSC    |
| GSE37772 | 11461.s1      | -         | SSC    |
| GSE37772 | 11418.s1      | -         | SSC    |
| GSE37772 | 11345.s1      | -         | SSC    |
| GSE37772 | 11466.s1      | -         | SSC    |
| GSE37772 | 11466.p1      | -         | SSC    |
| GSE37772 | 11178.s1      | -         | SSC    |
| GSE37772 | 11178.p1      | -         | SSC    |
| GSE37772 | 11244.s1      | -         | SSC    |
| GSE37772 | 11244.p1      | -         | SSC    |
| GSE37772 | 11189.s1      | -         | SSC    |
| GSE37772 | 11189.p1      | -         | SSC    |
| GSE37772 | 11420.s1      | -         | SSC    |
| GSE37772 | 11420.p1      | -         | SSC    |
| GSE37772 | 11424.s1      | -         | SSC    |
| GSE37772 | 11424.p1      | -         | SSC    |
| GSE37772 | 11410.s1      | -         | SSC    |
| GSE37772 | 11555.p1      | -         | SSC    |
| GSE37772 | 11511.p1      | -         | SSC    |
| GSE37772 | 11511.s1      | -         | SSC    |
| GSE37772 | 11329.p1      | -         | SSC    |
| GSE37772 | 11098.p1      | -         | SSC    |
| GSE37772 | 11154.p1      | -         | SSC    |
| GSE37772 | 11519.p1      | -         | SSC    |
| GSE37772 | 11007.s1      | -         | SSC    |
| GSE37772 | 11457.p1      | -         | SSC    |
| GSE37772 | 11482.s1      | -         | SSC    |
| GSE37772 | 11457.s1      | -         | SSC    |
| GSE37772 | 11327.p1      | -         | SSC    |
| GSE37772 | 11327.s1      | -         | SSC    |
| GSE37772 | 11489.p1      | -         | SSC    |
| GSE37772 | 11490.s1      | -         | SSC    |
| GSE37772 | 11102.s1      | -         | SSC    |
| GSE37772 | 11146.s1      | -         | SSC    |

Continued...



| Data Set | Individual ID | Sample ID | Source |
|----------|---------------|-----------|--------|
| GSE37772 | 11474.p1      | -         | SSC    |
| GSE37772 | 11474.s1      | -         | SSC    |
| GSE37772 | 11523.p1      | -         | SSC    |
| GSE37772 | 11191.s1      | -         | SSC    |
| GSE37772 | 11537.s1      | -         | SSC    |
| GSE37772 | 11014.p1      | -         | SSC    |
| GSE37772 | 11417.s1      | -         | SSC    |
| GSE37772 | 11479.s1      | -         | SSC    |
| GSE37772 | 11328.p1      | -         | SSC    |
| GSE37772 | 11057.s1      | -         | SSC    |
| GSE37772 | 11085.s1      | -         | SSC    |
| GSE37772 | 11089.s1      | -         | SSC    |
| GSE37772 | 11152.p1      | -         | SSC    |
| GSE37772 | 11418.p1      | -         | SSC    |
| GSE37772 | 11450.p1      | -         | SSC    |
| GSE37772 | 11260.p1      | -         | SSC    |
| GSE37772 | 11455.s1      | -         | SSC    |
| GSE37772 | 11412.s1      | -         | SSC    |
| GSE37772 | 11581.s1      | -         | SSC    |
| GSE37772 | 11412.p1      | -         | SSC    |
| GSE37772 | 11581.p1      | -         | SSC    |
| GSE37772 | 11425.p1      | -         | SSC    |
| GSE37772 | 11563.s1      | -         | SSC    |
| GSE37772 | 11425.s1      | -         | SSC    |
| GSE37772 | 11555.s1      | -         | SSC    |
| GSE37772 | 11329.s1      | -         | SSC    |
| GSE37772 | 11364.p1      | -         | SSC    |
| GSE37772 | 11032.p1      | -         | SSC    |
| GSE37772 | 11098.s1      | -         | SSC    |
| GSE37772 | 11572.p1      | -         | SSC    |
| GSE37772 | 11520.s1      | -         | SSC    |
| GSE37772 | 11475.s1      | -         | SSC    |
| GSE37772 | 11242.s1      | -         | SSC    |
| GSE37772 | 11378.s1      | -         | SSC    |
| GSE37772 | 11520.p1      | -         | SSC    |
| GSE37772 | 11475.p1      | -         | SSC    |
| GSE37772 | 11242.p1      | -         | SSC    |
| GSE37772 | 11154.s1      | -         | SSC    |
| GSE37772 | 11364.s1      | -         | SSC    |
| GSE37772 | 11415.p1      | -         | SSC    |
| GSE37772 | 11415.s1      | -         | SSC    |
| GSE37772 | 11121.s1      | -         | SSC    |
| GSE37772 | 11353.p1      | -         | SSC    |
| GSE37772 | 11353.s1      | -         | SSC    |

Continued...

| Data Set | Individual ID | Sample ID | Source |
|----------|---------------|-----------|--------|
| GSE37772 | 11000.p1      | -         | SSC    |
| GSE37772 | 11579.s1      | -         | SSC    |
| GSE37772 | 11233.s1      | -         | SSC    |
| GSE37772 | 11473.s1      | -         | SSC    |
| GSE37772 | 11445.p1      | -         | SSC    |
| GSE37772 | 11445.s1      | -         | SSC    |
| GSE37772 | 11469.s1      | -         | SSC    |
| GSE37772 | 11007.p1      | -         | SSC    |
| GSE37772 | 11480.s1      | -         | SSC    |
| GSE37772 | 11168.s1      | -         | SSC    |
| GSE37772 | 11030.p1      | -         | SSC    |
| GSE37772 | 11030.s1      | -         | SSC    |
| GSE37772 | 11149.p1      | -         | SSC    |
| GSE37772 | 11149.s1      | -         | SSC    |
| GSE37772 | 11382.p1      | -         | SSC    |
| GSE37772 | 11382.s1      | -         | SSC    |
| GSE37772 | 11265.s1      | -         | SSC    |
| GSE37772 | 11028.p1      | -         | SSC    |
| GSE37772 | 11046.p1      | -         | SSC    |
| GSE37772 | 11383.s1      | -         | SSC    |
| GSE37772 | 11383.p1      | -         | SSC    |
| GSE37772 | 11083.s1      | -         | SSC    |
| GSE37772 | 11303.s1      | -         | SSC    |
| GSE37772 | 11301.s1      | -         | SSC    |
| GSE37772 | 11410.p1      | -         | SSC    |
| GSE37772 | 11029.s1      | -         | SSC    |
| GSE37772 | 11029.p1      | -         | SSC    |
| GSE37772 | 11121.p1      | -         | SSC    |
| GSE37772 | 11291.s1      | -         | SSC    |
| GSE37772 | 11429.p1      | -         | SSC    |
| GSE37772 | 11572.s1      | -         | SSC    |
| GSE37772 | 11406.p1      | -         | SSC    |
| GSE37772 | 11180.p1      | -         | SSC    |
| GSE37772 | 11335.p1      | -         | SSC    |
| GSE37772 | 11461.p1      | -         | SSC    |
| GSE37772 | 11533.s1      | -         | SSC    |
| GSE37772 | 11337.s1      | -         | SSC    |
| GSE37772 | 11499.s1      | -         | SSC    |
| GSE37772 | 11458.s1      | -         | SSC    |
| GSE37772 | 11458.p1      | -         | SSC    |
| GSE37772 | 11533.p1      | -         | SSC    |
| GSE37772 | 11345.p1      | -         | SSC    |
| GSE37772 | 11379.s1      | -         | SSC    |
| GSE37772 | 11490.p1      | -         | SSC    |

Continued...

| Data Set | Individual ID | Sample ID | Source |
|----------|---------------|-----------|--------|
| GSE37772 | 11379.p1      | -         | SSC    |
| GSE37772 | 11450.s1      | -         | SSC    |
| GSE37772 | 11032.s1      | -         | SSC    |
| GSE37772 | 11000.s1      | -         | SSC    |
| GSE37772 | 11059.s1      | -         | SSC    |
| GSE37772 | 11459.s1      | -         | SSC    |
| GSE37772 | 11303.p1      | -         | SSC    |
| GSE37772 | 11378.p1      | -         | SSC    |
| GSE37772 | 11563.p1      | -         | SSC    |
| GSE37772 | 11413.s1      | -         | SSC    |
| GSE37772 | 11413.p1      | -         | SSC    |
| GSE37772 | 11524.s1      | -         | SSC    |
| GSE37772 | 11427.s1      | -         | SSC    |
| GSE37772 | 11005.s1      | -         | SSC    |
| GSE37772 | 11335.s1      | -         | SSC    |
| GSE37772 | 11524.p1      | -         | SSC    |
| GSE37772 | 11427.p1      | -         | SSC    |
| GSE37772 | 11348.s1      | -         | SSC    |
| GSE37772 | 11578.s1      | -         | SSC    |
| GSE37772 | 11473.p1      | -         | SSC    |
| GSE37772 | 11177.s1      | -         | SSC    |
| GSE37772 | 11192.p1      | -         | SSC    |
| GSE37772 | 11146.p1      | -         | SSC    |
| GSE37772 | 11523.s1      | -         | SSC    |
| GSE37772 | 11063.p1      | -         | SSC    |
| GSE37772 | 11338.p1      | -         | SSC    |
| GSE37772 | 11338.s1      | -         | SSC    |
| GSE37772 | 11271.p1      | -         | SSC    |
| GSE37772 | 11271.s1      | -         | SSC    |
| GSE37772 | 11260.s1      | -         | SSC    |
| GSE37772 | 11138.s1      | -         | SSC    |
| GSE37772 | 11138.p1      | -         | SSC    |
| GSE37772 | 11168.p1      | -         | SSC    |
| GSE37772 | 11063.s1      | -         | SSC    |
| GSE37772 | 11587.p1      | -         | SSC    |
| GSE37772 | 11537.p1      | -         | SSC    |
| GSE37772 | 11587.s1      | -         | SSC    |
| GSE37772 | 11348.p1      | -         | SSC    |
| GSE37772 | 11014.s1      | -         | SSC    |
| GSE37772 | 11337.p1      | -         | SSC    |
| GSE37772 | 11443.p1      | -         | SSC    |
| GSE37772 | 11156.s1      | -         | SSC    |
| GSE37772 | 11399.s1      | -         | SSC    |
| GSE37772 | 11323.s1      | -         | SSC    |

Continued...

| Data Set | Individual ID | Sample ID | Source  |
|----------|---------------|-----------|---------|
| GSE37772 | 11091.p1      | -         | SSC     |
| GSE37772 | 11208.p1      | -         | SSC     |
| GSE37772 | 11428.p1      | -         | SSC     |
| GSE37772 | 11004.p1      | -         | SSC     |
| GSE37772 | 11947.p1      | -         | SSC     |
| GSE37772 | 11442.p1      | -         | SSC     |
| GSE37772 | 11443.s1      | -         | SSC     |
| GSE37772 | 11442.s1      | -         | SSC     |
| GSE37772 | 11275.p1      | -         | SSC     |
| GSE37772 | 11426.p1      | -         | SSC     |
| GSE37772 | 11275.s1      | -         | SSC     |
| GSE37772 | 11426.s1      | -         | SSC     |
| GSE37772 | 11510.p1      | -         | SSC     |
| GSE25507 | 0118-01-C     | -         | Phoenix |
| GSE25507 | 0120-01-C     | -         | Phoenix |
| GSE25507 | 0137-01-C     | -         | Phoenix |
| GSE25507 | 0147-01-C     | -         | Phoenix |
| GSE25507 | 0148-01-C     | -         | Phoenix |
| GSE25507 | 0152-01-C     | -         | Phoenix |
| GSE25507 | 0153-01-C     | -         | Phoenix |
| GSE25507 | 0155-01-c     | -         | Phoenix |
| GSE25507 | 0156-01-C     | -         | Phoenix |
| GSE25507 | 0164-01-c     | -         | Phoenix |
| GSE25507 | 0165-01-C     | -         | Phoenix |
| GSE25507 | 0167-01-C     | -         | Phoenix |
| GSE25507 | 0170-01-C     | -         | Phoenix |
| GSE25507 | 0175-01-C     | -         | Phoenix |
| GSE25507 | 0178-01-C     | -         | Phoenix |
| GSE25507 | 0180-01-C     | -         | Phoenix |
| GSE25507 | 0184-01-1     | -         | Phoenix |
| GSE25507 | 0191-01-C     | -         | Phoenix |
| GSE25507 | 0192-01-C     | -         | Phoenix |
| GSE25507 | 0193-01-C     | -         | Phoenix |
| GSE25507 | 0195-01-C     | -         | Phoenix |
| GSE25507 | 0196-01-C     | -         | Phoenix |
| GSE25507 | 0198-01-c     | -         | Phoenix |
| GSE25507 | 0201-01-C-RR  | -         | Phoenix |
| GSE25507 | 0205-01-C     | -         | Phoenix |
| GSE25507 | 0466-01-C     | -         | Phoenix |
| GSE25507 | 0510-01-C     | -         | Phoenix |
| GSE25507 | 0511-01-c     | -         | Phoenix |
| GSE25507 | 0514-01-C     | -         | Phoenix |
| GSE25507 | 0515-01-C     | -         | Phoenix |
| GSE25507 | 0516-01-C     | -         | Phoenix |

Continued...

| <b>Data Set</b> | <b>Individual ID</b> | <b>Sample ID</b> | <b>Source</b> |
|-----------------|----------------------|------------------|---------------|
| GSE25507        | 0523-01-C            | -                | Phoenix       |
| GSE25507        | 0536-01-C            | -                | Phoenix       |
| GSE25507        | 0537-01-C            | -                | Phoenix       |
| GSE25507        | 0651-01-C            | -                | Phoenix       |
| GSE25507        | 0652-01-C            | -                | Phoenix       |
| GSE25507        | 0653-01-C            | -                | Phoenix       |
| GSE25507        | 0671-01-C            | -                | Phoenix       |
| GSE25507        | 0702-01-C-b          | -                | Phoenix       |
| GSE25507        | 0966-01-C            | -                | Phoenix       |
| GSE25507        | 0967-01-C            | -                | Phoenix       |
| GSE25507        | 0968-01-C            | -                | Phoenix       |
| GSE25507        | 0970-01-C            | -                | Phoenix       |
| GSE25507        | 0972-01-C            | -                | Phoenix       |
| GSE25507        | 0974-01-C            | -                | Phoenix       |
| GSE25507        | 0975-01-C            | -                | Phoenix       |
| GSE25507        | 0977-01-C            | -                | Phoenix       |
| GSE25507        | 0978-01-C            | -                | Phoenix       |
| GSE25507        | 0979-01-C            | -                | Phoenix       |
| GSE25507        | 0982-01-c            | -                | Phoenix       |
| GSE25507        | 0983-01-C            | -                | Phoenix       |
| GSE25507        | 0986-01-C            | -                | Phoenix       |
| GSE25507        | 0989-01-C            | -                | Phoenix       |
| GSE25507        | 0990-01-C            | -                | Phoenix       |
| GSE25507        | 0991-01-C            | -                | Phoenix       |
| GSE25507        | 0992-01-c            | -                | Phoenix       |
| GSE25507        | 0993-01-C            | -                | Phoenix       |
| GSE25507        | 0998-01-C            | -                | Phoenix       |
| GSE25507        | 1118-01-C            | -                | Phoenix       |
| GSE25507        | 121-01-C             | -                | Phoenix       |
| GSE25507        | 166-01-C             | -                | Phoenix       |
| GSE25507        | SARRC-0146-01-C      | -                | Phoenix       |
| GSE25507        | SARRC-0994-01-C      | -                | Phoenix       |
| GSE25507        | 0105-01-A            | -                | Phoenix       |
| GSE25507        | 0151-01-C            | -                | Phoenix       |
| GSE25507        | 0199-01-C            | -                | Phoenix       |
| GSE25507        | 0238-01-A            | -                | Phoenix       |
| GSE25507        | 0301-01-A            | -                | Phoenix       |
| GSE25507        | 0561-01-A            | -                | Phoenix       |
| GSE25507        | 0562-01-A            | -                | Phoenix       |
| GSE25507        | 0577-01-A            | -                | Phoenix       |
| GSE25507        | 0705-01-A            | -                | Phoenix       |
| GSE25507        | 0711-04-A            | -                | Phoenix       |
| GSE25507        | 0790-01-A            | -                | Phoenix       |
| GSE25507        | 0810-01-A            | -                | Phoenix       |

Continued...

| <b>Data Set</b> | <b>Individual ID</b> | <b>Sample ID</b> | <b>Source</b> |
|-----------------|----------------------|------------------|---------------|
| GSE25507        | 0820-01-A            | -                | Phoenix       |
| GSE25507        | 0833-01-C            | -                | Phoenix       |
| GSE25507        | 0844-01-A            | -                | Phoenix       |
| GSE25507        | 0922-01-A            | -                | Phoenix       |
| GSE25507        | 0943-01-A            | -                | Phoenix       |
| GSE25507        | 0947-01-A-b          | -                | Phoenix       |
| GSE25507        | 0949-01-A            | -                | Phoenix       |
| GSE25507        | 0950-01-A            | -                | Phoenix       |
| GSE25507        | 0959-01-A            | -                | Phoenix       |
| GSE25507        | 1005-01-A            | -                | Phoenix       |
| GSE25507        | 1006-03-A            | -                | Phoenix       |
| GSE25507        | 1009-03-A            | -                | Phoenix       |
| GSE25507        | 1011-03-A-b          | -                | Phoenix       |
| GSE25507        | 1015-01-A            | -                | Phoenix       |
| GSE25507        | 1023-01-A-b          | -                | Phoenix       |
| GSE25507        | 1030-03-A-b          | -                | Phoenix       |
| GSE25507        | 1044-03-A            | -                | Phoenix       |
| GSE25507        | 1049-03-A            | -                | Phoenix       |
| GSE25507        | 1051-03-A-b          | -                | Phoenix       |
| GSE25507        | 1052-03-A            | -                | Phoenix       |
| GSE25507        | 1053-03-A            | -                | Phoenix       |
| GSE25507        | 1056-03-A            | -                | Phoenix       |
| GSE25507        | 1056-05-A            | -                | Phoenix       |
| GSE25507        | 1061-03-A-b          | -                | Phoenix       |
| GSE25507        | 1064-03-A            | -                | Phoenix       |
| GSE25507        | 1065-03-C            | -                | Phoenix       |
| GSE25507        | 1067-03-A            | -                | Phoenix       |
| GSE25507        | 1076-03-A            | -                | Phoenix       |
| GSE25507        | 1082-01-C            | -                | Phoenix       |
| GSE25507        | 1083-03-A            | -                | Phoenix       |
| GSE25507        | 1099-03-A            | -                | Phoenix       |
| GSE25507        | 1106-03-A            | -                | Phoenix       |
| GSE25507        | 1116-03-A            | -                | Phoenix       |
| GSE25507        | 1119-03-A            | -                | Phoenix       |
| GSE25507        | 1122-03-A            | -                | Phoenix       |
| GSE25507        | 1124-02-A            | -                | Phoenix       |
| GSE25507        | 1132-03-A            | -                | Phoenix       |
| GSE25507        | 1138-03-A-b          | -                | Phoenix       |
| GSE25507        | 1156-03-A            | -                | Phoenix       |
| GSE25507        | 1163-03-A            | -                | Phoenix       |
| GSE25507        | 1164-03-A            | -                | Phoenix       |
| GSE25507        | 1186-03-A-b          | -                | Phoenix       |
| GSE25507        | 1193-03-A-b          | -                | Phoenix       |
| GSE25507        | 1194-03-A            | -                | Phoenix       |

Continued...

| Data Set   | Individual ID    | Sample ID | Source  |
|------------|------------------|-----------|---------|
| GSE25507   | 1195-03-A        | -         | Phoenix |
| GSE25507   | 1197-03-A        | -         | Phoenix |
| GSE25507   | 1198-03-A        | -         | Phoenix |
| GSE25507   | 1199-01-A        | -         | Phoenix |
| GSE25507   | 1200-03-A        | -         | Phoenix |
| GSE25507   | 1202-03-A        | -         | Phoenix |
| GSE25507   | 1203-03-A        | -         | Phoenix |
| GSE25507   | 1204-03-A-b      | -         | Phoenix |
| GSE25507   | 1205-01-A        | -         | Phoenix |
| GSE25507   | 1209-03-A        | -         | Phoenix |
| GSE25507   | 2095-03-A        | -         | Phoenix |
| GSE25507   | 2096-03-A        | -         | Phoenix |
| GSE25507   | 2097-03-A        | -         | Phoenix |
| GSE25507   | 2098-03-A        | -         | Phoenix |
| GSE25507   | 2103-03-A        | -         | Phoenix |
| GSE25507   | 2107-03-A        | -         | Phoenix |
| GSE25507   | 2112-01-A        | -         | Phoenix |
| GSE25507   | 2117-01-A        | -         | Phoenix |
| GSE25507   | 2119-03-A        | -         | Phoenix |
| GSE25507   | 2120-03-A        | -         | Phoenix |
| GSE25507   | SARRC-0248-01-A  | -         | Phoenix |
| GSE25507   | SARRC-1021-01-A  | -         | Phoenix |
| GSE25507   | SARRC-1100-03-Aq | -         | Phoenix |
| GSE25507   | SARRC-2089-02-A  | -         | Phoenix |
| GSE18123.1 | A-0006-P1        | -         | Boston  |
| GSE18123.1 | A-0008-P1        | -         | Boston  |
| GSE18123.1 | A-0010-P1        | -         | Boston  |
| GSE18123.1 | A-0016-P1        | -         | Boston  |
| GSE18123.1 | A-0021-P1        | -         | Boston  |
| GSE18123.1 | A-0022-P1        | -         | Boston  |
| GSE18123.1 | A-0023-P1        | -         | Boston  |
| GSE18123.1 | A-0025-P1        | -         | Boston  |
| GSE18123.1 | A-0028-P1        | -         | Boston  |
| GSE18123.1 | A-0030-P1        | -         | Boston  |
| GSE18123.1 | A-0031-P1        | -         | Boston  |
| GSE18123.1 | A-0032-P1        | -         | Boston  |
| GSE18123.1 | A-0034-P1        | -         | Boston  |
| GSE18123.1 | A-0041-P1        | -         | Boston  |
| GSE18123.1 | A-0042-P1        | -         | Boston  |
| GSE18123.1 | A-0044-P1        | -         | Boston  |
| GSE18123.1 | A-0050-P1        | -         | Boston  |
| GSE18123.1 | A-0052-P1        | -         | Boston  |
| GSE18123.1 | A-0053-P1        | -         | Boston  |
| GSE18123.1 | A-0055-A1        | -         | Boston  |

Continued...

| <b>Data Set</b> | <b>Individual ID</b> | <b>Sample ID</b> | <b>Source</b> |
|-----------------|----------------------|------------------|---------------|
| GSE18123.1      | A-0057-P1            | -                | Boston        |
| GSE18123.1      | A-0058-P1            | -                | Boston        |
| GSE18123.1      | A-0065-P1            | -                | Boston        |
| GSE18123.1      | A-0068-P1            | -                | Boston        |
| GSE18123.1      | A-0070-P1            | -                | Boston        |
| GSE18123.1      | A-0072-P1            | -                | Boston        |
| GSE18123.1      | A-0074-A1            | -                | Boston        |
| GSE18123.1      | A-0076-P1            | -                | Boston        |
| GSE18123.1      | A-0078-P1            | -                | Boston        |
| GSE18123.1      | A-0086-P1            | -                | Boston        |
| GSE18123.1      | A-0088-P1            | -                | Boston        |
| GSE18123.1      | A-0090-P1            | -                | Boston        |
| GSE18123.1      | A-0091-P1            | -                | Boston        |
| GSE18123.1      | A-0094-P1            | -                | Boston        |
| GSE18123.1      | A-0095-P1            | -                | Boston        |
| GSE18123.1      | A-0096-P1            | -                | Boston        |
| GSE18123.1      | A-0101-P1            | -                | Boston        |
| GSE18123.1      | A-0105-P1            | -                | Boston        |
| GSE18123.1      | A-0108-P1            | -                | Boston        |
| GSE18123.1      | A-0111-P1            | -                | Boston        |
| GSE18123.1      | A-0116-P1            | -                | Boston        |
| GSE18123.1      | A-0119-P1            | -                | Boston        |
| GSE18123.1      | A-0120-P1            | -                | Boston        |
| GSE18123.1      | A-0126-P1            | -                | Boston        |
| GSE18123.1      | A-0127-P1            | -                | Boston        |
| GSE18123.1      | A-0128-P1            | -                | Boston        |
| GSE18123.1      | A-0131-P1            | -                | Boston        |
| GSE18123.1      | A-0132-P1            | -                | Boston        |
| GSE18123.1      | A-0133-P1            | -                | Boston        |
| GSE18123.1      | A-0134-P1            | -                | Boston        |
| GSE18123.1      | AC02-1003-01         | -                | Boston        |
| GSE18123.1      | AC02-1004-01         | -                | Boston        |
| GSE18123.1      | AC02-1006-01         | -                | Boston        |
| GSE18123.1      | AC02-1007-01         | -                | Boston        |
| GSE18123.1      | AC02-1009-01         | -                | Boston        |
| GSE18123.1      | AC02-1113-01         | -                | Boston        |
| GSE18123.1      | AC02-1140-01         | -                | Boston        |
| GSE18123.1      | AC02-1141-01         | -                | Boston        |
| GSE18123.1      | AC02-1172-01         | -                | Boston        |
| GSE18123.1      | AC02-1178-01         | -                | Boston        |
| GSE18123.1      | AC02-1183-01         | -                | Boston        |
| GSE18123.1      | AC02-1189-01         | -                | Boston        |
| GSE18123.1      | AC02-1197-01         | -                | Boston        |
| GSE18123.1      | AC02-1211-01         | -                | Boston        |

Continued...



| <b>Data Set</b> | <b>Individual ID</b> | <b>Sample ID</b> | <b>Source</b> |
|-----------------|----------------------|------------------|---------------|
| GSE18123.1      | M-02-141             | -                | Boston        |
| GSE18123.1      | M-03-040             | -                | Boston        |
| GSE18123.1      | M-03-049             | -                | Boston        |
| GSE18123.1      | M-03-058             | -                | Boston        |
| GSE18123.1      | M-03-075             | -                | Boston        |
| GSE18123.1      | M-03-168             | -                | Boston        |
| GSE18123.1      | M-03-169             | -                | Boston        |
| GSE18123.1      | M-04-006             | -                | Boston        |
| GSE18123.1      | M-04-022             | -                | Boston        |
| GSE18123.1      | M-04-035             | -                | Boston        |
| GSE18123.1      | M-04-065             | -                | Boston        |
| GSE18123.1      | M-06-103             | -                | Boston        |
| GSE18123.1      | M-09-090             | -                | Boston        |
| GSE18123.1      | M-11-003             | -                | Boston        |
| GSE18123.1      | M-11-155             | -                | Boston        |
| GSE18123.1      | M-12-052             | -                | Boston        |
| GSE18123.1      | M-12-060             | -                | Boston        |
| GSE18123.1      | M-12-070             | -                | Boston        |
| GSE18123.1      | M-12-102             | -                | Boston        |
| GSE18123.1      | M-12-152             | -                | Boston        |
| GSE18123.1      | M-13-005             | -                | Boston        |
| GSE18123.1      | M-13-012             | -                | Boston        |
| GSE18123.1      | M-13-032             | -                | Boston        |
| GSE18123.1      | M-13-087             | -                | Boston        |
| GSE18123.1      | M-13-116             | -                | Boston        |
| GSE18123.1      | M-15-023             | -                | Boston        |
| GSE18123.1      | M-15-030             | -                | Boston        |
| GSE18123.1      | M-16-018             | -                | Boston        |
| GSE18123.2      | AC02-1253-01         | -                | Boston        |
| GSE18123.2      | AC02-1288-01         | -                | Boston        |
| GSE18123.2      | AC02-1289-01         | -                | Boston        |
| GSE18123.2      | AC02-1297-01         | -                | Boston        |
| GSE18123.2      | AC02-1302-01         | -                | Boston        |
| GSE18123.2      | AC02-1302-04         | -                | Boston        |
| GSE18123.2      | AC02-1317-01         | -                | Boston        |
| GSE18123.2      | AC02-1324-04         | -                | Boston        |
| GSE18123.2      | AC02-1333-01         | -                | Boston        |
| GSE18123.2      | AC02-1344-01         | -                | Boston        |
| GSE18123.2      | AC02-1351-01         | -                | Boston        |
| GSE18123.2      | AC02-1354-01         | -                | Boston        |
| GSE18123.2      | AC02-1293-01         | -                | Boston        |
| GSE18123.2      | AC02-1318-04         | -                | Boston        |
| GSE18123.2      | AC02-1336-04         | -                | Boston        |
| GSE18123.2      | A-0071-P1            | -                | Boston        |

Continued...

| <b>Data Set</b> | <b>Individual ID</b> | <b>Sample ID</b> | <b>Source</b> |
|-----------------|----------------------|------------------|---------------|
| GSE18123.2      | A-0074-P2            | -                | Boston        |
| GSE18123.2      | A-0075-P1            | -                | Boston        |
| GSE18123.2      | A-0076-A1            | -                | Boston        |
| GSE18123.2      | A-0077-P1            | -                | Boston        |
| GSE18123.2      | A-0081-P1            | -                | Boston        |
| GSE18123.2      | A-0082-P1            | -                | Boston        |
| GSE18123.2      | A-0085-P2            | -                | Boston        |
| GSE18123.2      | A-0098-P1            | -                | Boston        |
| GSE18123.2      | A-0103-P1            | -                | Boston        |
| GSE18123.2      | A-0114-P2            | -                | Boston        |
| GSE18123.2      | A-0119-A1            | -                | Boston        |
| GSE18123.2      | A-0119-A2            | -                | Boston        |
| GSE18123.2      | A-0125-A1            | -                | Boston        |
| GSE18123.2      | A-0125-A2            | -                | Boston        |
| GSE18123.2      | AC01-0004-01         | -                | Boston        |
| GSE18123.2      | AC01-0037-01         | -                | Boston        |
| GSE18123.2      | AC01-0061-01         | -                | Boston        |
| GSE18123.2      | AC01-0076-01         | -                | Boston        |
| GSE18123.2      | AC02-1007-04         | -                | Boston        |
| GSE18123.2      | AC02-1008-01         | -                | Boston        |
| GSE18123.2      | AC02-1115-01         | -                | Boston        |
| GSE18123.2      | AC02-1153-01         | -                | Boston        |
| GSE18123.2      | AC02-1168-01         | -                | Boston        |
| GSE18123.2      | AC02-1168-05         | -                | Boston        |
| GSE18123.2      | AC02-1181-01         | -                | Boston        |
| GSE18123.2      | AC02-1189-01         | -                | Boston        |
| GSE18123.2      | AC02-1198-01         | -                | Boston        |
| GSE18123.2      | AC02-1201-01         | -                | Boston        |
| GSE18123.2      | AC02-1206-01         | -                | Boston        |
| GSE18123.2      | AC02-1215-01         | -                | Boston        |
| GSE18123.2      | AC02-1217-01         | -                | Boston        |
| GSE18123.2      | AC02-1217-04         | -                | Boston        |
| GSE18123.2      | AC02-1224-01         | -                | Boston        |
| GSE18123.2      | AC02-1225-01         | -                | Boston        |
| GSE18123.2      | AC02-1226-01         | -                | Boston        |
| GSE18123.2      | AC02-1247-01         | -                | Boston        |
| GSE18123.2      | AC02-1274-01         | -                | Boston        |
| GSE18123.2      | AC02-1278-01         | -                | Boston        |
| GSE18123.2      | AC02-1278-04         | -                | Boston        |
| GSE18123.2      | AC03-1001-01         | -                | Boston        |
| GSE18123.2      | AC03-1002-01         | -                | Boston        |
| GSE18123.2      | AC03-1003-01         | -                | Boston        |
| GSE18123.2      | AC03-1009-01         | -                | Boston        |
| GSE18123.2      | AC04-0015-01         | -                | Boston        |

Continued...

| <b>Data Set</b> | <b>Individual ID</b> | <b>Sample ID</b> | <b>Source</b> |
|-----------------|----------------------|------------------|---------------|
| GSE18123.2      | AC04-0020-01         | -                | Boston        |
| GSE18123.2      | AC05-0002-01         | -                | Boston        |
| GSE18123.2      | AC05-0002-04         | -                | Boston        |
| GSE18123.2      | AC05-0070-01         | -                | Boston        |
| GSE18123.2      | AC05-0071-01         | -                | Boston        |
| GSE18123.2      | AC05-0078-01         | -                | Boston        |
| GSE18123.2      | AC05-1001-01         | -                | Boston        |
| GSE18123.2      | AC05-1003-04         | -                | Boston        |
| GSE18123.2      | AC05-1005-04         | -                | Boston        |
| GSE18123.2      | AC05-1009-01         | -                | Boston        |
| GSE18123.2      | AC05-1013-01         | -                | Boston        |
| GSE18123.2      | AC05-1013-04         | -                | Boston        |
| GSE18123.2      | F-03-046             | -                | Boston        |
| GSE18123.2      | F-03-066             | -                | Boston        |
| GSE18123.2      | F-04-081             | -                | Boston        |
| GSE18123.2      | F-04-162             | -                | Boston        |
| GSE18123.2      | F-04-172             | -                | Boston        |
| GSE18123.2      | F-04-202             | -                | Boston        |
| GSE18123.2      | F-04-207             | -                | Boston        |
| GSE18123.2      | F-05-188             | -                | Boston        |
| GSE18123.2      | F-05-239             | -                | Boston        |
| GSE18123.2      | F-06-098             | -                | Boston        |
| GSE18123.2      | F-09-071             | -                | Boston        |
| GSE18123.2      | F-11-093             | -                | Boston        |
| GSE18123.2      | F-11-192             | -                | Boston        |
| GSE18123.2      | F-11-214             | -                | Boston        |
| GSE18123.2      | F-12-174             | -                | Boston        |
| GSE18123.2      | F-12-241             | -                | Boston        |
| GSE18123.2      | F-13-101             | -                | Boston        |
| GSE18123.2      | F-13-112             | -                | Boston        |
| GSE18123.2      | F-15-059             | -                | Boston        |
| GSE18123.2      | F-16-115             | -                | Boston        |
| GSE18123.2      | F-16-149             | -                | Boston        |
| GSE18123.2      | M-02-147             | -                | Boston        |
| GSE18123.2      | M-03-175             | -                | Boston        |
| GSE18123.2      | M-03-203             | -                | Boston        |
| GSE18123.2      | M-03-230             | -                | Boston        |
| GSE18123.2      | M-04-201             | -                | Boston        |
| GSE18123.2      | M-04-240             | -                | Boston        |
| GSE18123.2      | M-06-217             | -                | Boston        |
| GSE18123.2      | M-07-194             | -                | Boston        |
| GSE18123.2      | M-12-148             | -                | Boston        |
| GSE18123.2      | M-12-186             | -                | Boston        |
| GSE18123.2      | M-13-157             | -                | Boston        |

Continued...

| <b>Data Set</b> | <b>Individual ID</b> | <b>Sample ID</b> | <b>Source</b> |
|-----------------|----------------------|------------------|---------------|
| GSE18123.2      | M-14-129             | -                | Boston        |
| GSE18123.2      | M-16-128             | -                | Boston        |
| GSE18123.2      | AC05-1047-01         | -                | Boston        |
| GSE18123.2      | AC01-1019-04         | -                | Boston        |
| GSE18123.2      | AC02-1253-04         | -                | Boston        |
| GSE18123.2      | AC02-1331-01         | -                | Boston        |
| GSE18123.2      | AC02-1334-01         | -                | Boston        |
| GSE18123.2      | AC02-1334-04         | -                | Boston        |
| GSE18123.2      | AC02-1360-01         | -                | Boston        |
| GSE18123.2      | AC02-1361-01         | -                | Boston        |
| GSE18123.2      | AC02-1364-01         | -                | Boston        |
| GSE18123.2      | AC02-1364-04         | -                | Boston        |
| GSE18123.2      | AC02-1370-01         | -                | Boston        |
| GSE18123.2      | AC02-1375-01         | -                | Boston        |
| GSE18123.2      | AC02-1378-01         | -                | Boston        |
| GSE18123.2      | AC02-1380-01         | -                | Boston        |
| GSE18123.2      | AC02-1382-01         | -                | Boston        |
| GSE18123.2      | AC02-1392-04         | -                | Boston        |
| GSE18123.2      | AC02-1336-05         | -                | Boston        |
| GSE18123.2      | AC02-1387-01         | -                | Boston        |
| GSE18123.2      | AC02-1387-04         | -                | Boston        |
| GSE18123.2      | A-0087-P2            | -                | Boston        |
| GSE18123.2      | A-0097-P2            | -                | Boston        |
| GSE18123.2      | AC01-0030-04         | -                | Boston        |
| GSE18123.2      | AC01-0069-01         | -                | Boston        |
| GSE18123.2      | AC02-1010-01         | -                | Boston        |
| GSE18123.2      | AC02-1173-01         | -                | Boston        |
| GSE18123.2      | AC02-1181-04         | -                | Boston        |
| GSE18123.2      | AC02-1184-01         | -                | Boston        |
| GSE18123.2      | AC02-1197-04         | -                | Boston        |
| GSE18123.2      | AC02-1211-04         | -                | Boston        |
| GSE18123.2      | AC02-1223-04         | -                | Boston        |
| GSE18123.2      | AC02-1238-04         | -                | Boston        |
| GSE18123.2      | AC02-1240-04         | -                | Boston        |
| GSE18123.2      | AC02-1248-05         | -                | Boston        |
| GSE18123.2      | AC02-1249-01         | -                | Boston        |
| GSE18123.2      | AC03-1009-04         | -                | Boston        |
| GSE18123.2      | AC05-0003-04         | -                | Boston        |
| GSE18123.2      | AC05-0023-04         | -                | Boston        |
| GSE18123.2      | AC05-1001-04         | -                | Boston        |
| GSE18123.2      | AC05-1004-04         | -                | Boston        |
| GSE18123.2      | AC05-1016-01         | -                | Boston        |
| GSE18123.2      | AC05-1024-01         | -                | Boston        |
| GSE18123.2      | AC05-1032-01         | -                | Boston        |

Continued...

| <b>Data Set</b> | <b>Individual ID</b> | <b>Sample ID</b> | <b>Source</b> |
|-----------------|----------------------|------------------|---------------|
| GSE18123.2      | AC05-1032-05         | -                | Boston        |
| GSE18123.2      | F-02-083             | -                | Boston        |
| GSE18123.2      | F-02-117             | -                | Boston        |
| GSE18123.2      | F-02-218             | -                | Boston        |
| GSE18123.2      | F-03-067             | -                | Boston        |
| GSE18123.2      | F-03-167             | -                | Boston        |
| GSE18123.2      | F-04-076             | -                | Boston        |
| GSE18123.2      | M-14-190             | -                | Boston        |

Supplementary Table 17: Blood samples included in the meta-analysis.

(a)

| <b>GSE28521</b>          | <b>ASD</b> | <b>Control</b> | <b>Total</b> |
|--------------------------|------------|----------------|--------------|
| <b>Number of samples</b> | 8          | 10             | 18           |
| <b>Age range (yrs)</b>   | 5-39       | 16-56          |              |
| <b>Gender (M:F)</b>      | 6:2        | All males      |              |
| <b>PMI</b>               | 6.75-43.25 | 4.75-28.92     |              |
| <b>GSE38322</b>          | <b>ASD</b> | <b>Control</b> | <b>Total</b> |
| <b>Number of samples</b> | 7          | 8              | 15           |
| <b>Age range (yrs)</b>   | 2-39       | 1-60           |              |
| <b>Gender (M:F)</b>      | All male   | All male       |              |
| <b>PMI</b>               | 4.00-43.00 | 13.00-24.20    |              |

(b)

|                 | <b>Differentially expressed genes at FDR&lt;0.05</b> | <b>Up-regulated genes</b> | <b>Down-regulated genes</b> |
|-----------------|------------------------------------------------------|---------------------------|-----------------------------|
| <b>GSE28521</b> | 14                                                   | 1                         | 13                          |
| <b>GSE38322</b> | 0                                                    | 0                         | 0                           |

(c)

|             | <b>GeneSymbol</b> | <b>Gene ID</b> | <b>p-value</b> | <b>FDR</b> | <b>Map loci</b> |
|-------------|-------------------|----------------|----------------|------------|-----------------|
| <b>Up</b>   | LY6H              | 4062           | 2.63e-06       | 4.34e-02   | 8q24.3          |
| <b>Down</b> | SGCA              | 6442           | 2.73e-06       | 4.51e-02   | 17q21           |
|             | ENTPD6            | 955            | 8.07e-06       | 4.56e-02   | 20p11.21        |
|             | COL11A2           | 1302           | 8.98e-06       | 4.56e-02   | 6p21.3          |
|             | KIAA0513          | 9764           | 1.19e-05       | 4.56e-02   | 16q24.1         |
|             | MEG3              | 55384          | 1.69e-05       | 4.56e-02   | 14q32           |
|             | CPLX3             | 594855         | 2.55e-05       | 4.56e-02   | 15q24.1         |
|             | FNDC9             | 408263         | 2.64e-05       | 4.56e-02   | 5q33.3          |
|             | MAP3K6            | 9064           | 2.80e-05       | 4.56e-02   | 1p36.11         |
|             | BRICD5            | 283870         | 2.84e-05       | 4.56e-02   | 16p13.3         |
|             | MORN1             | 79906          | 2.86e-05       | 4.56e-02   | 1p36.33-p36.32  |
|             | ULK3              | 25989          | 3.04e-05       | 4.56e-02   | 15q24.1         |
|             | SCN4B             | 6330           | 3.43e-05       | 4.71e-02   | 11q23.3         |
|             | SLC7A8            | 23428          | 3.75e-05       | 4.76e-02   | 14q11.2         |

Supplementary Table 18: a) Study design for samples from the cerebellum in GSE38322 and GSE28521. Samples that failed quality control tests were removed. We also collapsed technical replicates by obtaining the average expression of samples from the same individual.; b) Number of differentially expressed genes identified in the cerebellum. Sex-linked genes were removed from the GSE28521's results due to an imbalanced gender ratio in the study design; c) Differentially expressed genes in GSE28521.

# Supplementary Figures

## List of Supplementary Figures

|    |                                                                                                                                                                                                                                                                                                                                                                                                                                                     |    |
|----|-----------------------------------------------------------------------------------------------------------------------------------------------------------------------------------------------------------------------------------------------------------------------------------------------------------------------------------------------------------------------------------------------------------------------------------------------------|----|
| 1  | Quality control of brain samples: a) Samples obtained from the temporal cortex and frontal cortex of the same individual exhibit highly correlated expression values. Data from GSE28521 shown here; b) Expression profiles of samples from the cerebellum differ from that of the cortex, as seen in the sample correlation matrix of GSE28521. . . . .                                                                                            | 48 |
| 2  | Batch effects: a) Clustering of datapoints into distinct batches with respective percentage variances, suggesting the presence of batch effects. b) Batch effects were removed after batch correction (includes robust probes only). . . . .                                                                                                                                                                                                        | 49 |
| 3  | $1 - \pi_0$ values for each study against sample size. Error bars denote standard errors for 100 bootstrap iterations. PBL: peripheral blood lymphocytes; LCL: lymphoblastoid cell lines; WB: whole blood. . . . .                                                                                                                                                                                                                                  | 50 |
| 4  | Comparison between results obtained from the Fisher's method and the Meta-Rank method. The peaks on the left suggests that genes ranked at the top are similar for both methods. . . .                                                                                                                                                                                                                                                              | 51 |
| 5  | Sex-linked genes, typically from studies with a gender-imbalanced study design, skew meta-profiles.                                                                                                                                                                                                                                                                                                                                                 | 52 |
| 6  | Gene expression levels of core blood signature genes. Grey area: missing values. . . . .                                                                                                                                                                                                                                                                                                                                                            | 53 |
| 7  | P-values of core blood signatures in individual studies. Top: Quantile-quantile plots. Deviation from the diagonal for indicates that the gene is robust. Bottom: Raw p-values in each individual re-analysis, marked with a triangle if it meets an FDR threshold of 0.05 in that data set. a) Up-regulated genes. b) Down-regulated genes. . . . .                                                                                                | 55 |
| 8  | P-values of core brain signatures in individual studies. Top: Quantile-quantile plots. Deviation from the diagonal for indicates that the gene is robust. Bottom: Raw p-values in each individual re-analysis, marked with a triangle if it meets an FDR threshold of 0.05 in that data set. a) Up-regulated genes. b) Down-regulated genes. . . . .                                                                                                | 57 |
| 9  | Raw p-values of genes located in 15q11-13 (UBE3A, CYFIP1) Xp22 (CDKL5), and 7q11.23 (RFC2). Top(Q-Q plots): The lack of an overall deviation from the uniform diagonal suggests that the signals are skewed. Bottom: Per-dataset p-value with a p-value threshold of 0.05 (dashed grey); genes that meet an FDR threshold of 0.05 in the dataset are marked with a triangle. Compare with core blood signatures provided in the supplement. . . . . | 58 |
| 10 | PPIN network properties of core candidate genes in the blood and brain. The properties of the genes were not significantly different from random gene sets. . . . .                                                                                                                                                                                                                                                                                 | 59 |
| 11 | Common brain meta-signatures between the autism (current study) and schizophrenia meta-analyses by Mistry et al. a) Up-regulated genes; b) Down-regulated genes. . . . .                                                                                                                                                                                                                                                                            | 60 |
| 12 | Core signature genes are highly ranked (differentially expressed) in the cortex. The patterns differ in the cerebellum, suggesting that the cortex and cerebellum do not share similar molecular signatures in autism. . . . .                                                                                                                                                                                                                      | 60 |
| 13 | Gene expression levels of core blood signature genes from a) LCL subgroup b) non-LCL subgroup. Grey area: missing values. . . . .                                                                                                                                                                                                                                                                                                                   | 61 |
| 14 | P-values of core LCL signatures in individual studies. Dotted lines indicate p-value threshold of 0.05. a) Up-regulated genes. b) Down-regulated genes. . . . .                                                                                                                                                                                                                                                                                     | 62 |
| 15 | P-values of core non-LCL signatures in individual studies. Dotted lines indicate p-value threshold of 0.05. a) Up-regulated genes. b) Down-regulated genes. . . . .                                                                                                                                                                                                                                                                                 | 63 |
| 16 | Heatmaps illustrating spearman ranked correlations (scaled) of p-values among blood datasets.                                                                                                                                                                                                                                                                                                                                                       | 64 |





(a)

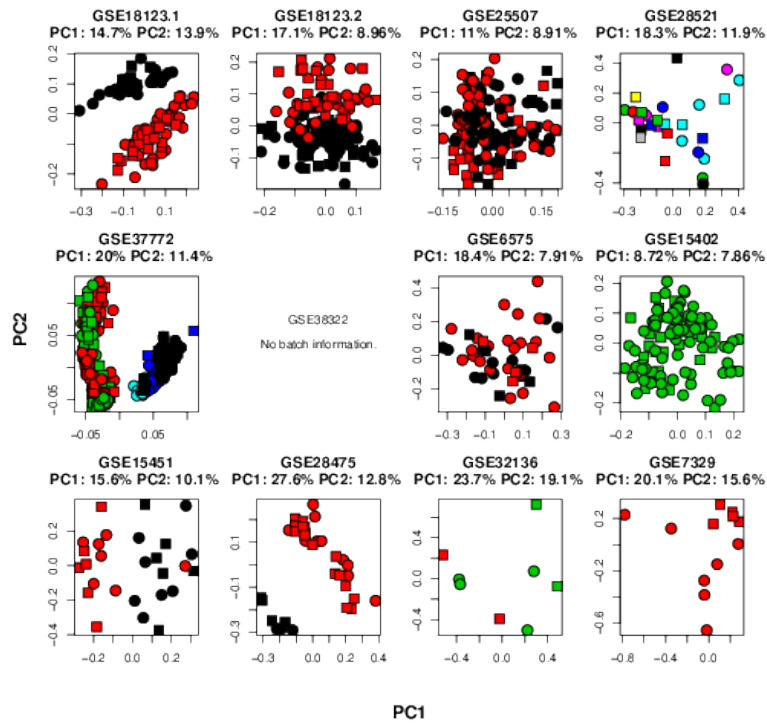

(b)

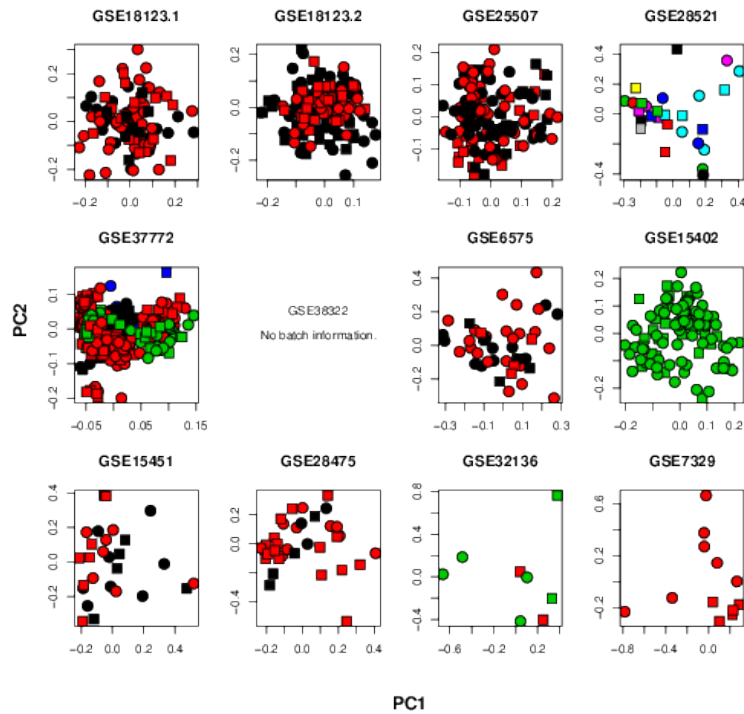

Supplementary Figure 2: Batch effects: a) Clustering of datapoints into distinct batches with respective percentage variances, suggesting the presence of batch effects. b) Batch effects were removed after batch correction (includes robust probes only).

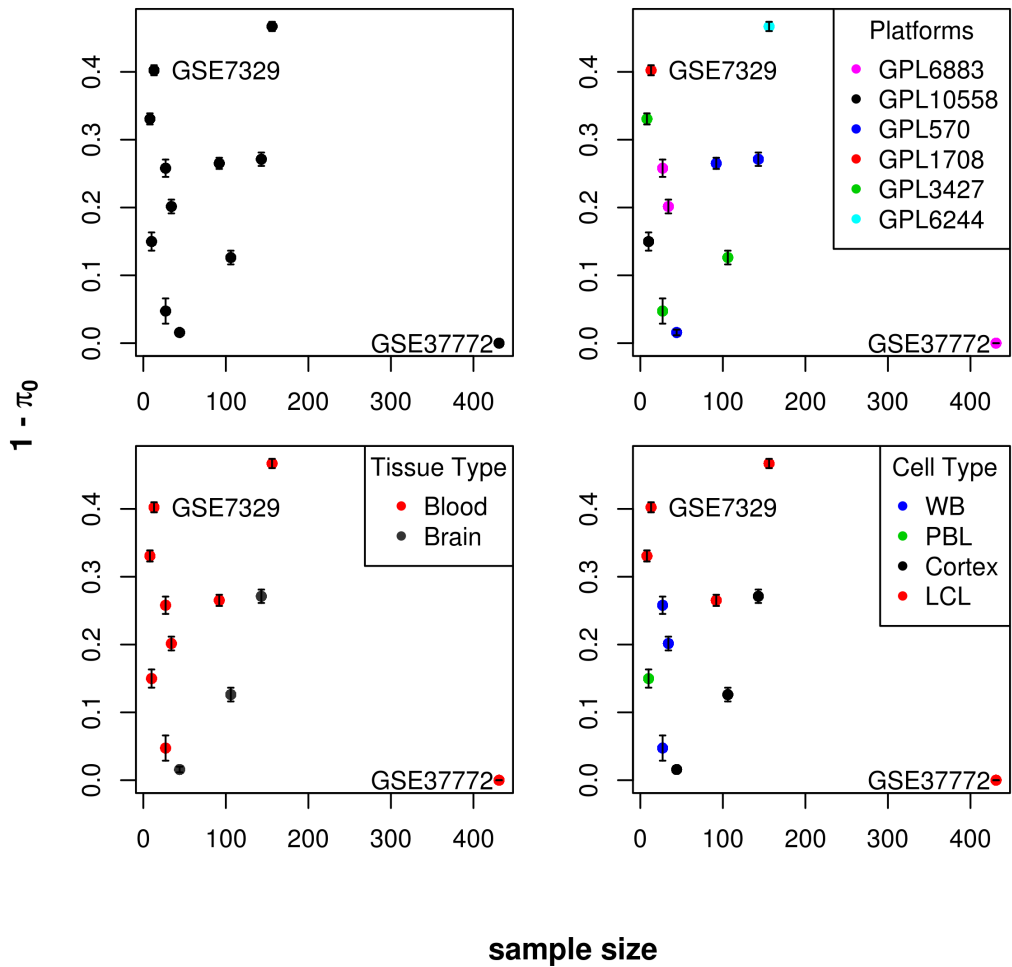

Supplementary Figure 3:  $1 - \pi_0$  values for each study against sample size. Error bars denote standard errors for 100 bootstrap iterations. PBL: peripheral blood lymphocytes; LCL: lymphoblastoid cell lines; WB: whole blood.

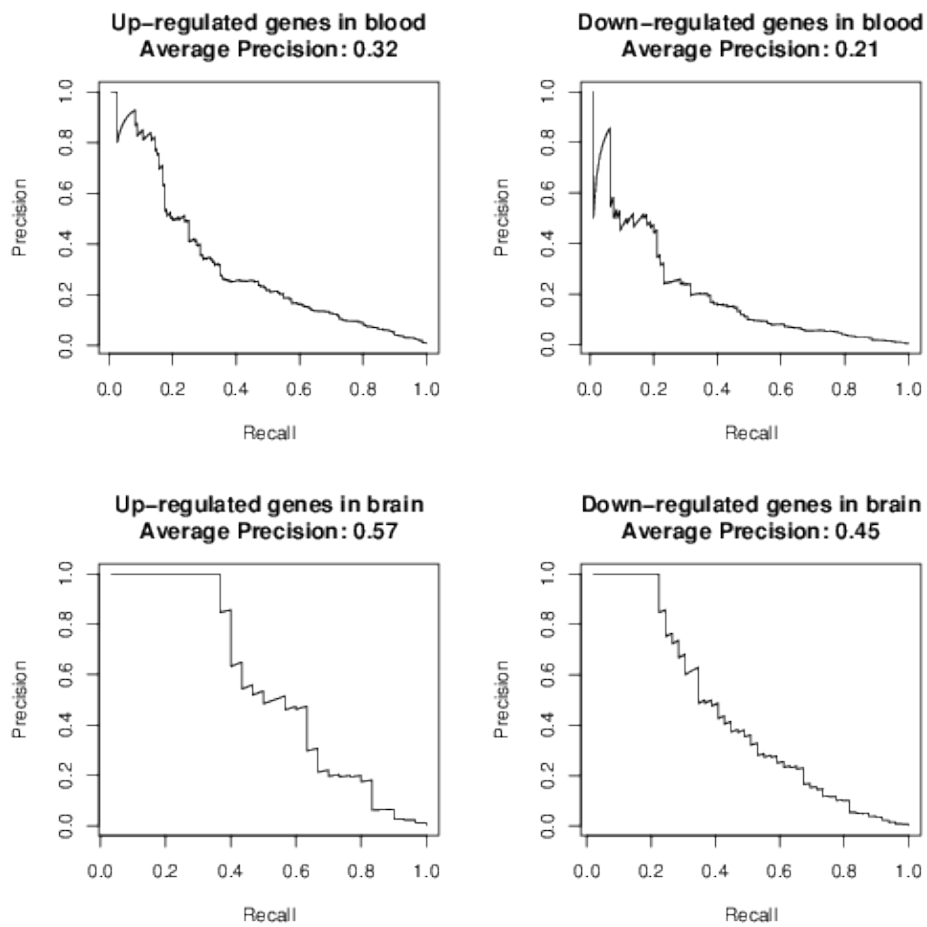

Supplementary Figure 4: Comparison between results obtained from the Fisher's method and the Meta-Rank method. The peaks on the left suggests that genes ranked at the top are similar for both methods.

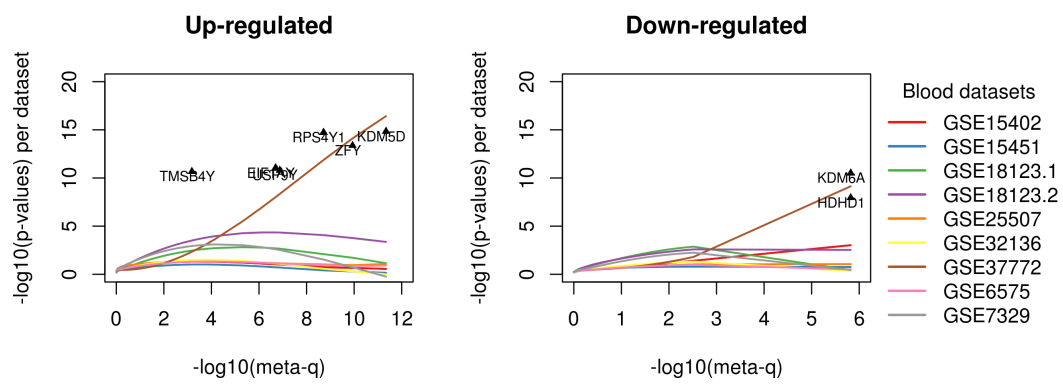

Supplementary Figure 5: Sex-linked genes, typically from studies with a gender-imbalanced study design, skew meta-profiles.

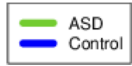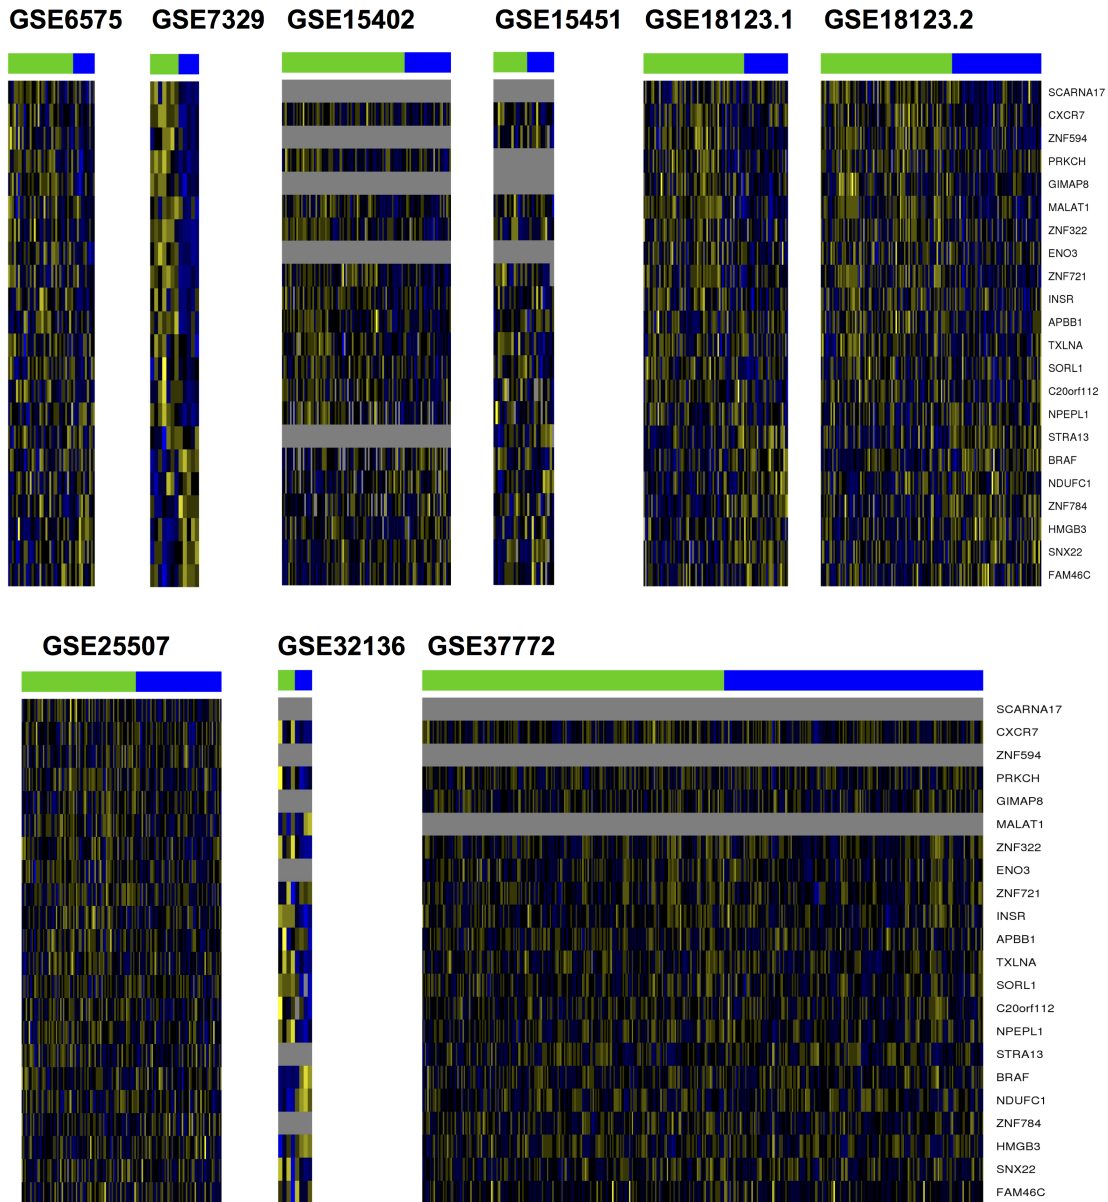

Supplementary Figure 6: Gene expression levels of core blood signature genes. Grey area: missing values.

(a)

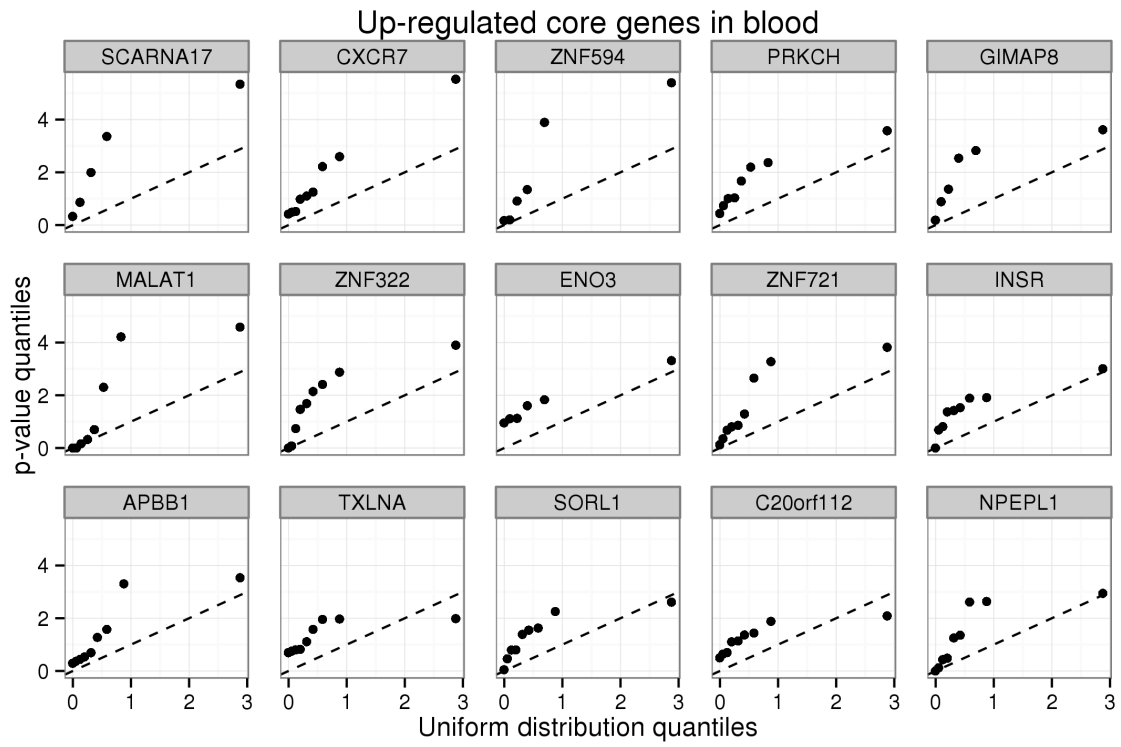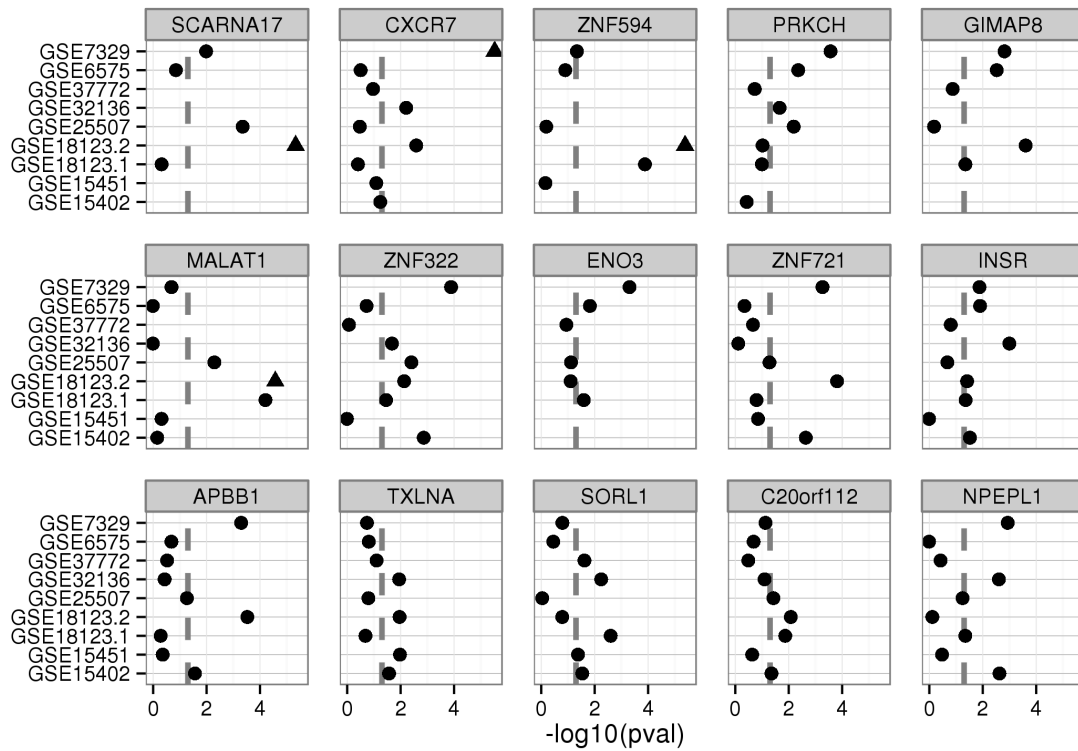

(b)

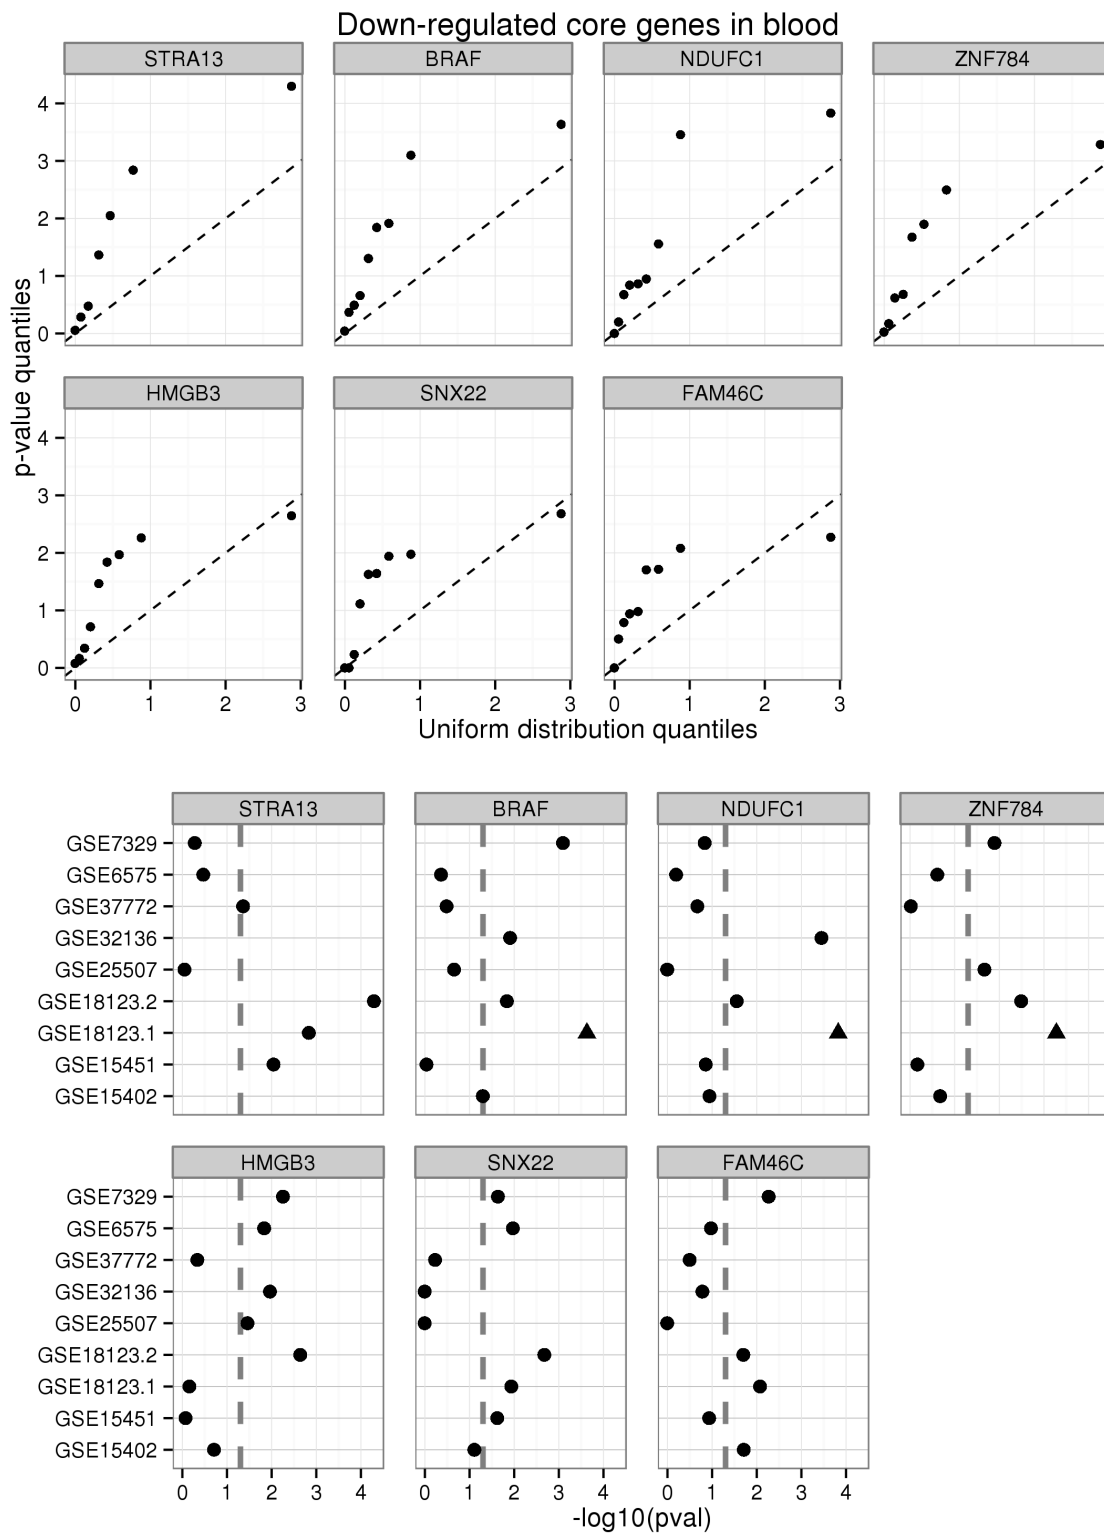

Supplementary Figure 7: P-values of core blood signatures in individual studies. Top: Quantile-quantile plots. Deviation from the diagonal for indicates that the gene is robust. Bottom: Raw p-values in each individual re-analysis, marked with a triangle if it meets an FDR threshold of 0.05 in that data set. a) Up-regulated genes. b) Down-regulated genes.

(a)

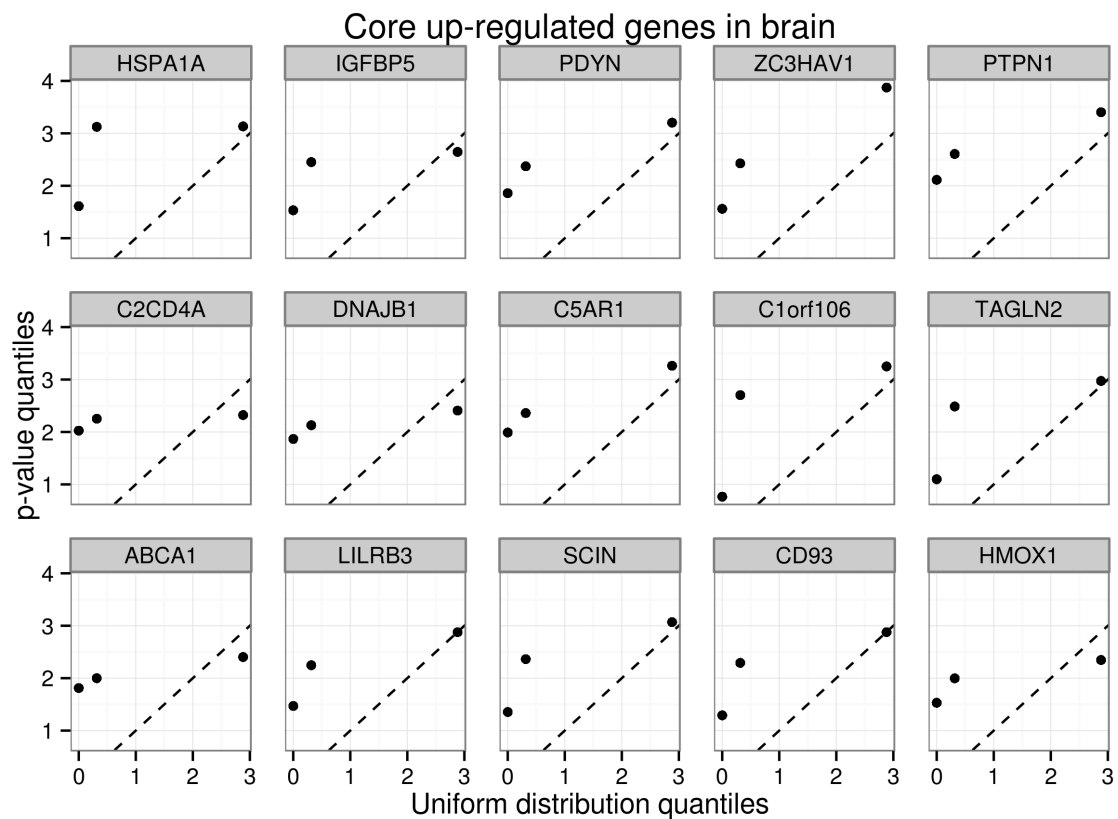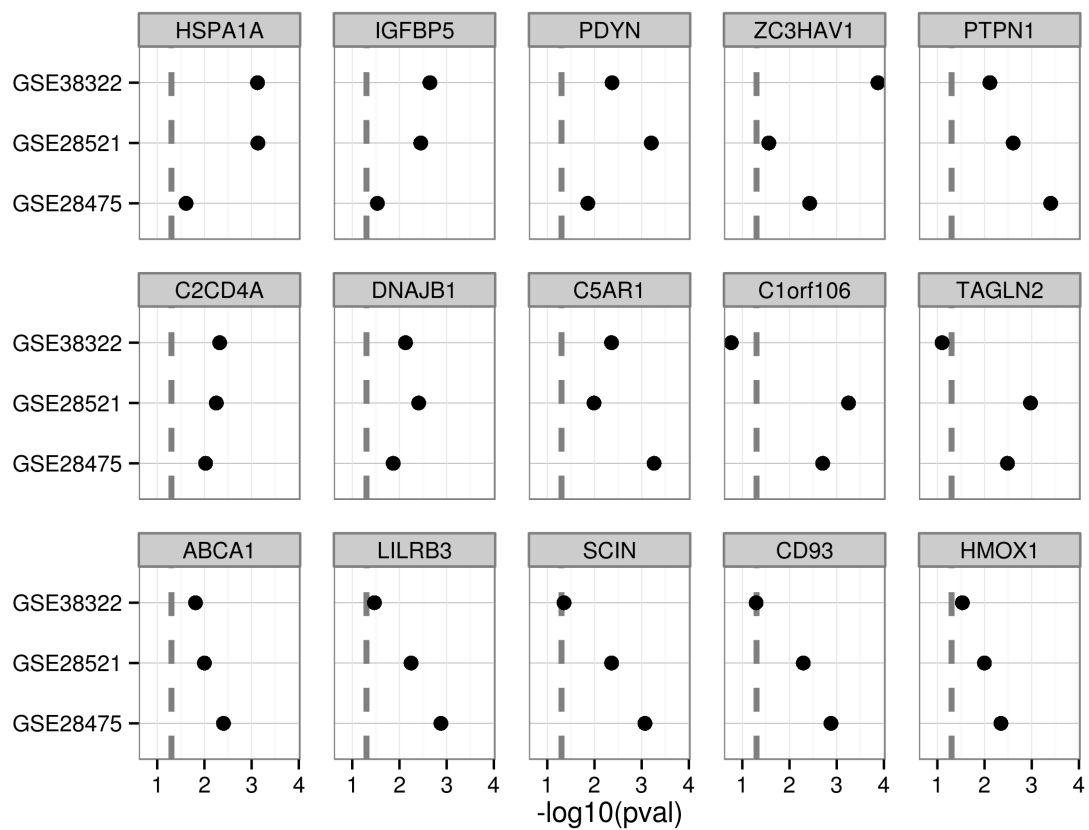



(b)

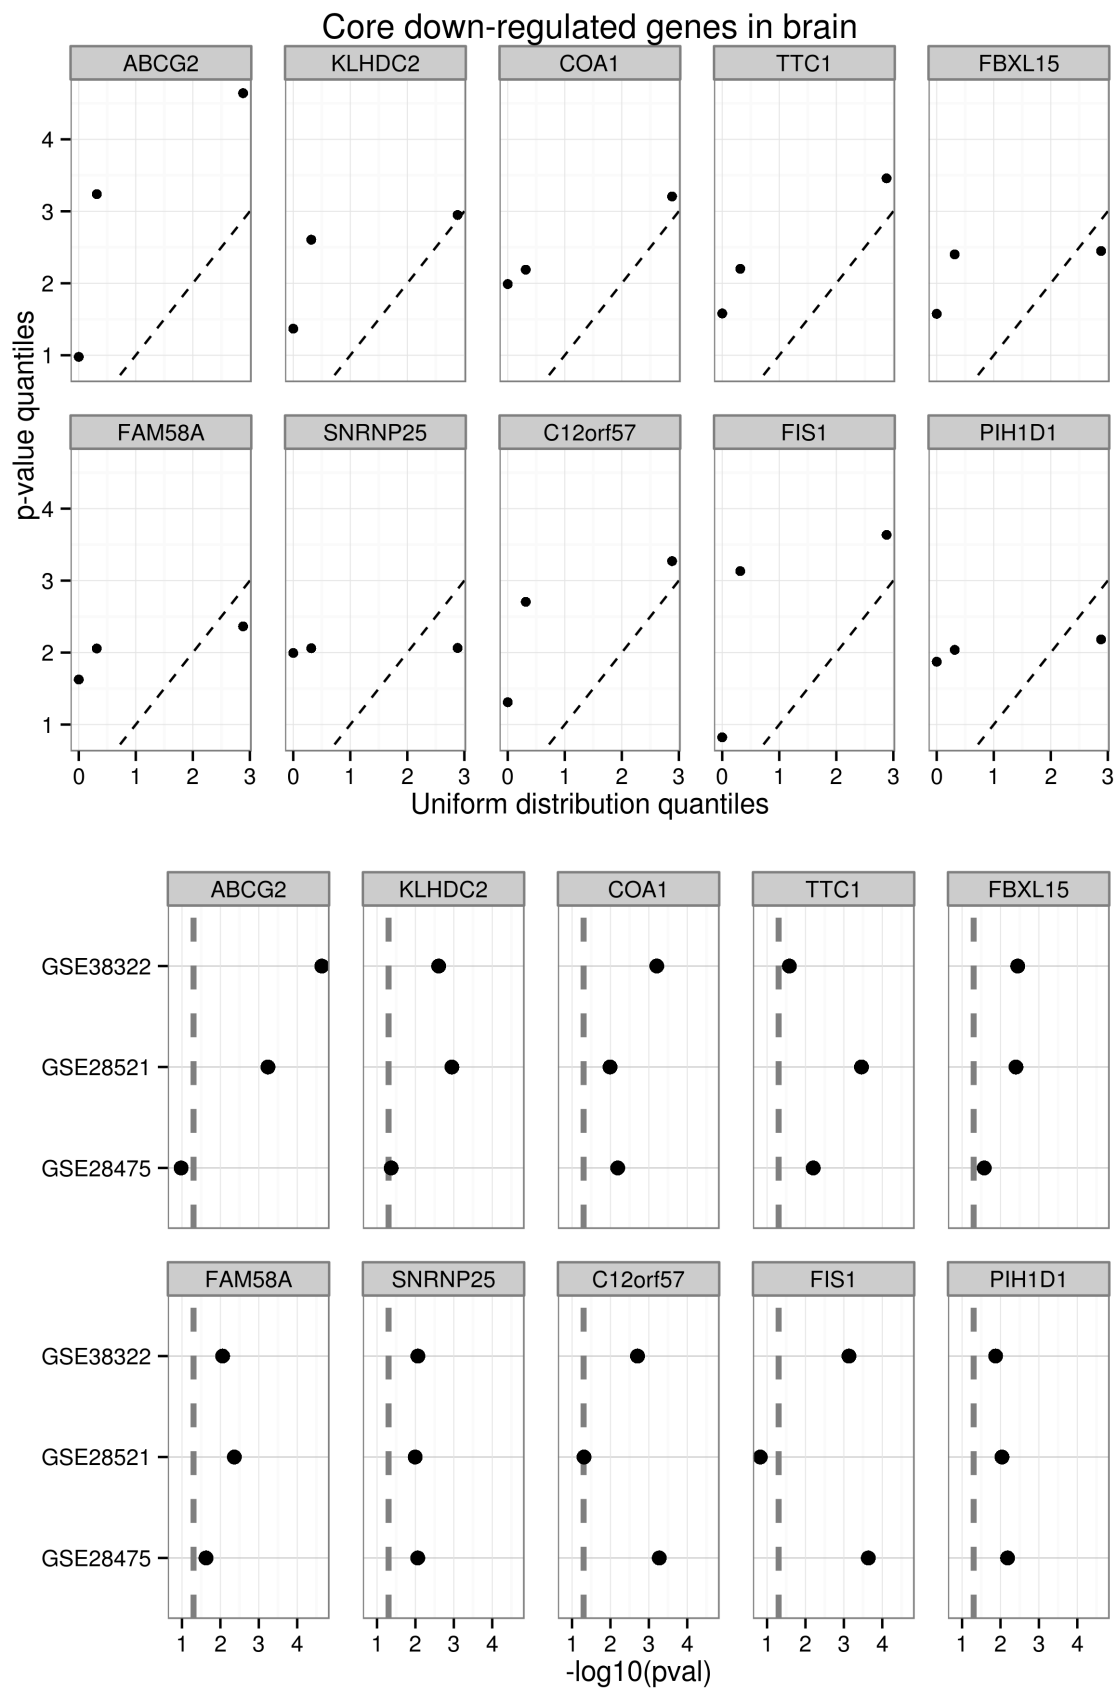

Supplementary Figure 8: P-values of core brain signatures in individual studies. Top: Quantile-quantile plots. Deviation from the diagonal for indicates that the gene is robust. Bottom: Raw p-values in each individual re-analysis, marked with a triangle if it meets an FDR threshold of 0.05 in that data set. a) Up-regulated genes. b) Down-regulated genes.

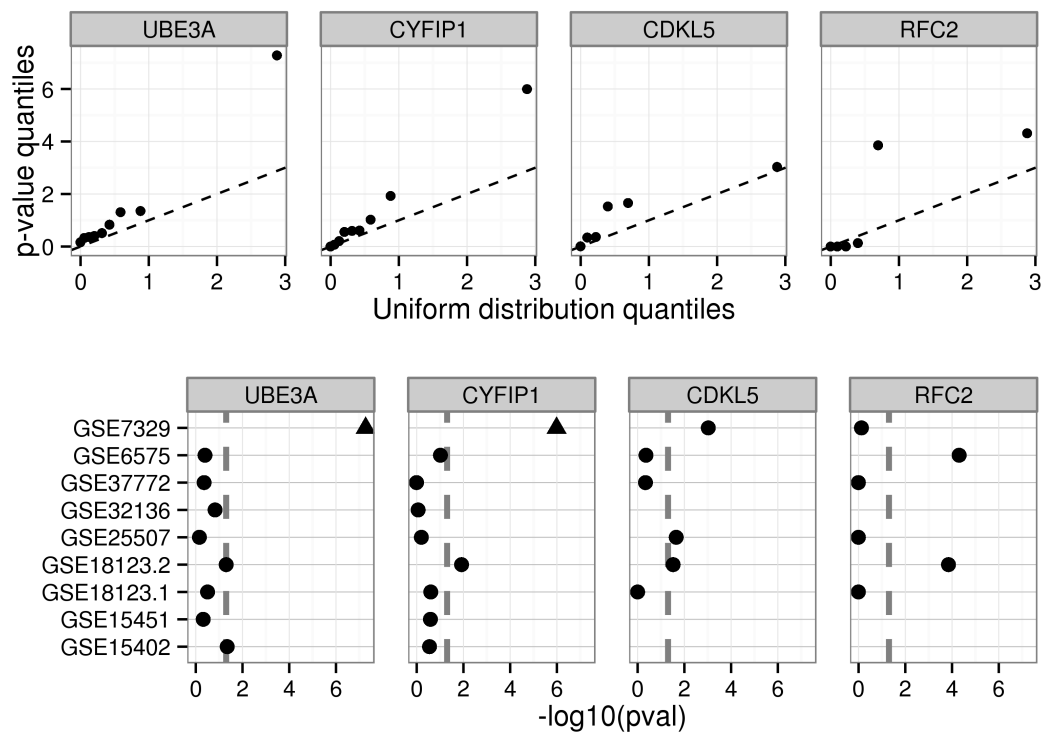

Supplementary Figure 9: Raw p-values of genes located in 15q11-13 (UBE3A, CYFIP1) Xp22 (CDKL5), and 7q11.23 (RFC2). Top(Q-Q plots): The lack of an overall deviation from the uniform diagonal suggests that the signals are skewed. Bottom: Per-dataset p-value with a p-value threshold of 0.05 (dashed grey); genes that meet an FDR threshold of 0.05 in the dataset are marked with a triangle. Compare with core blood signatures provided in the supplement.

**Blood**

**p = 0.3279**

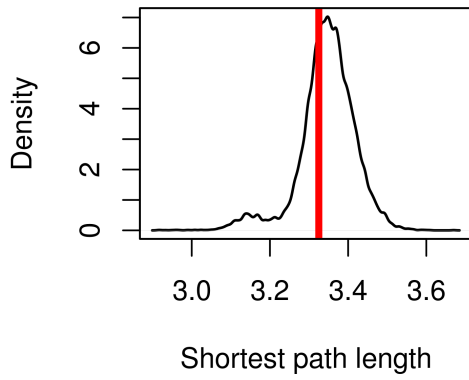

**p = 0.3077**

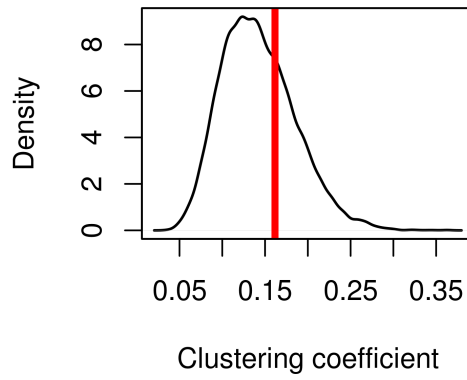

**Brain**

**p = 0.2422**

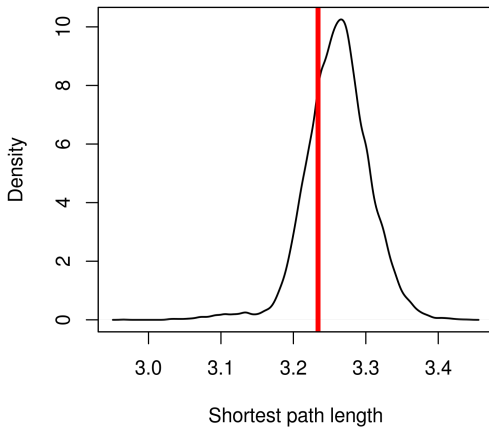

**p = 0.9251**

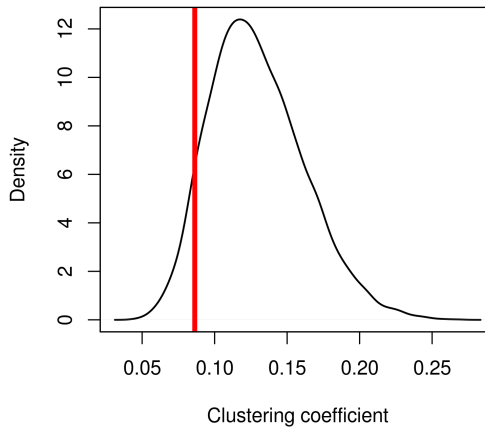

Supplementary Figure 10: PPIN network properties of core candidate genes in the blood and brain. The properties of the genes were not significantly different from random gene sets.

(a)

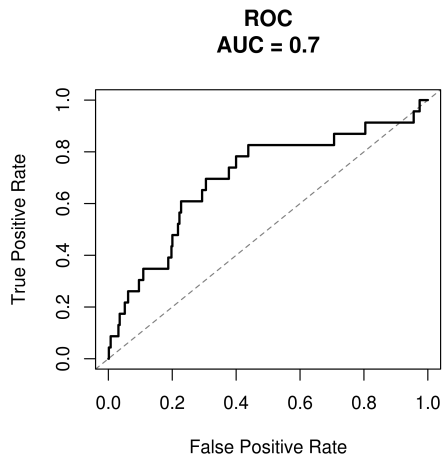

(b)

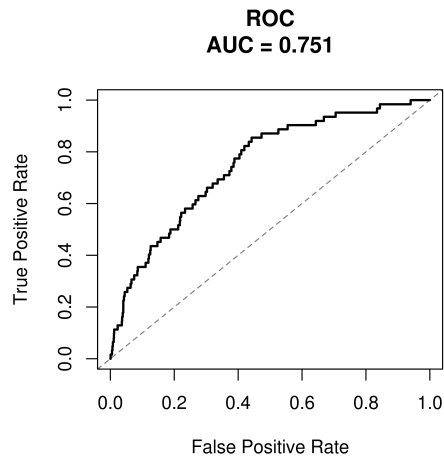

Supplementary Figure 11: Common brain meta-signatures between the autism (current study) and schizophrenia meta-analyses by Mistry et al. a) Up-regulated genes; b) Down-regulated genes.

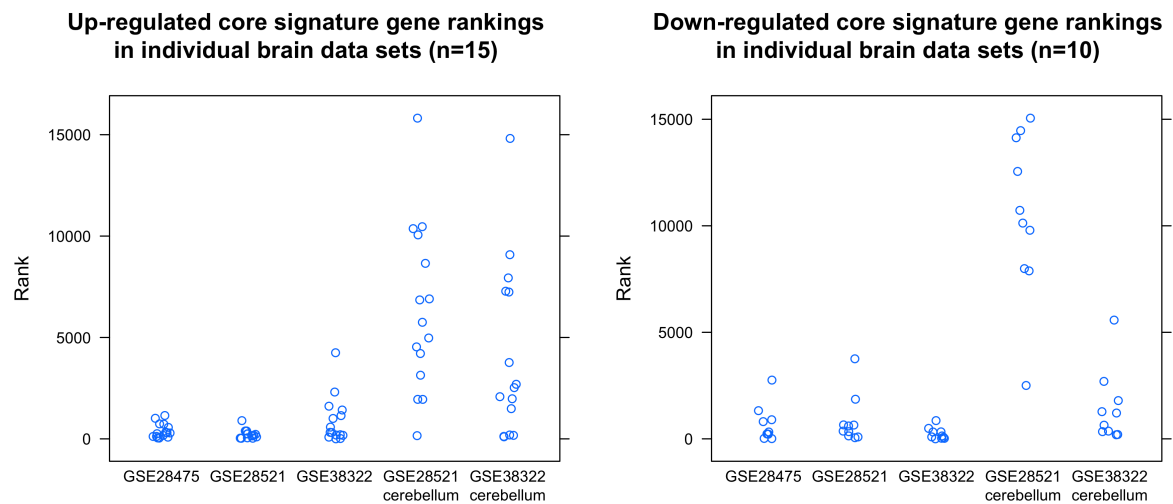

Supplementary Figure 12: Core signature genes are highly ranked (differentially expressed) in the cortex. The patterns differ in the cerebellum, suggesting that the cortex and cerebellum do not share similar molecular signatures in autism.

(a)

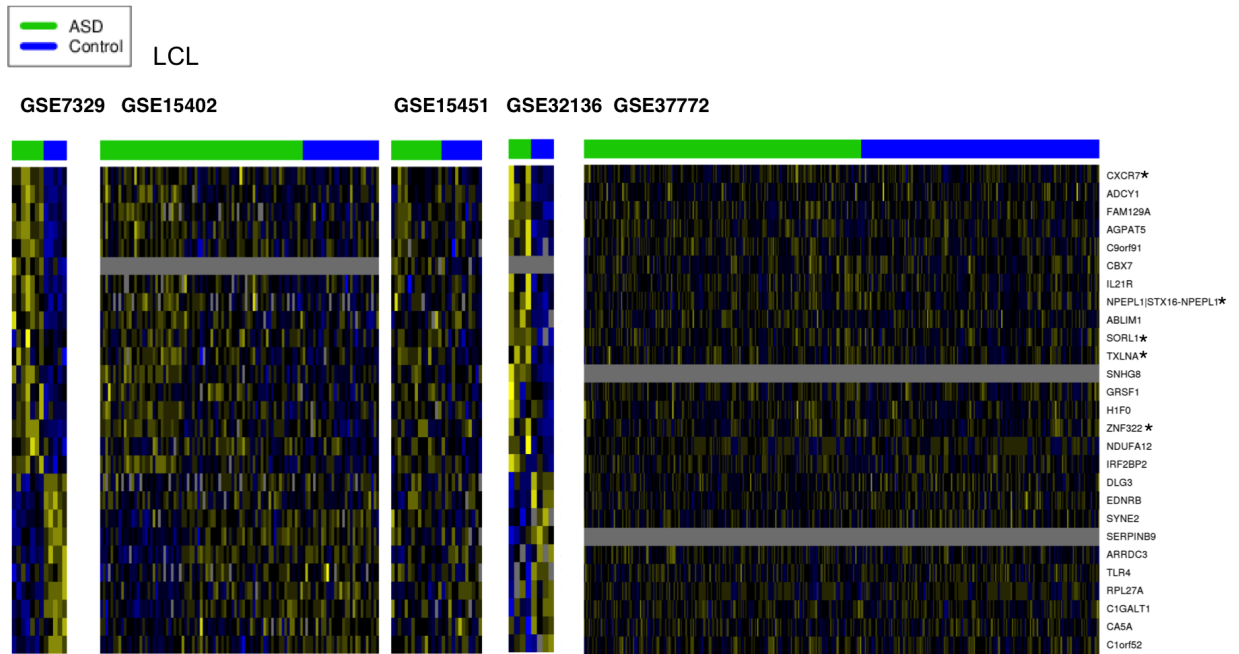

(b)

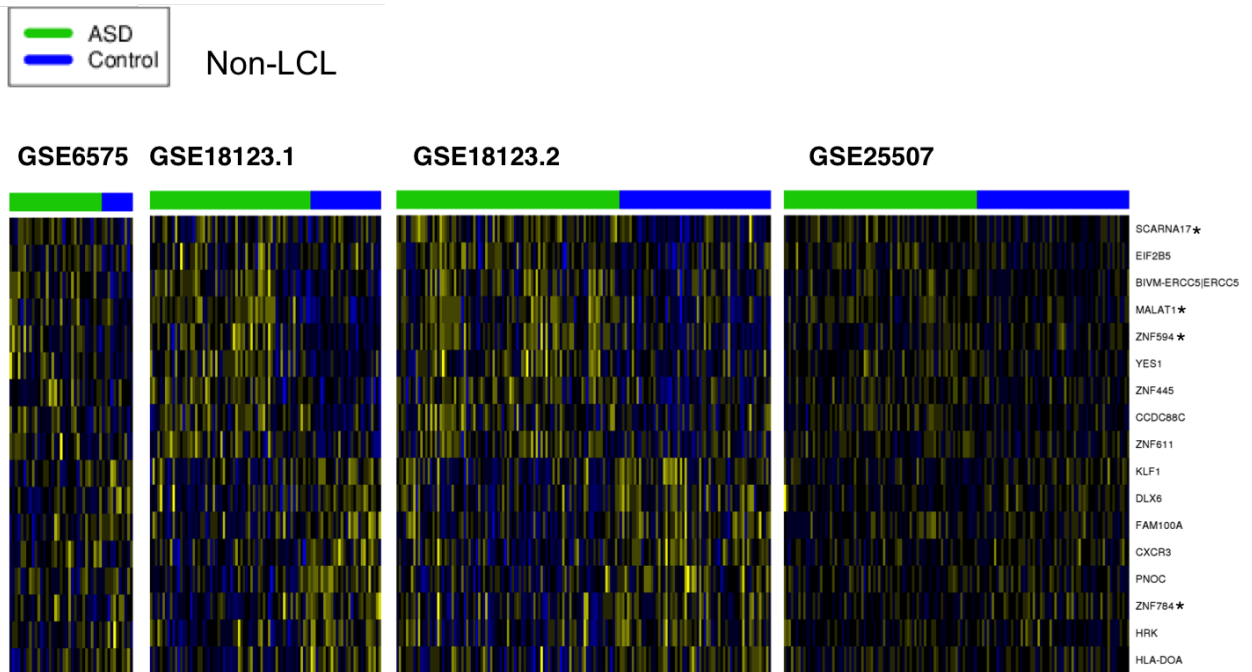

Supplementary Figure 13: Gene expression levels of core blood signature genes from a) LCL subgroup b) non-LCL subgroup. Grey area: missing values. Genes marked with an asterisk were also found in the analysis with all blood data sets.

(a)

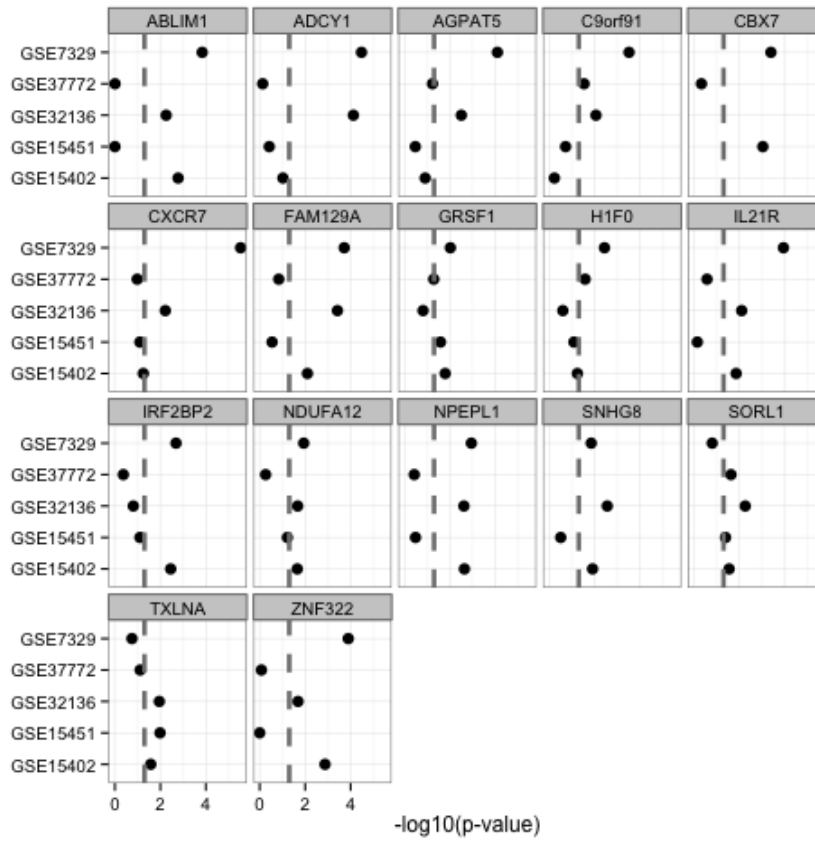

(b)

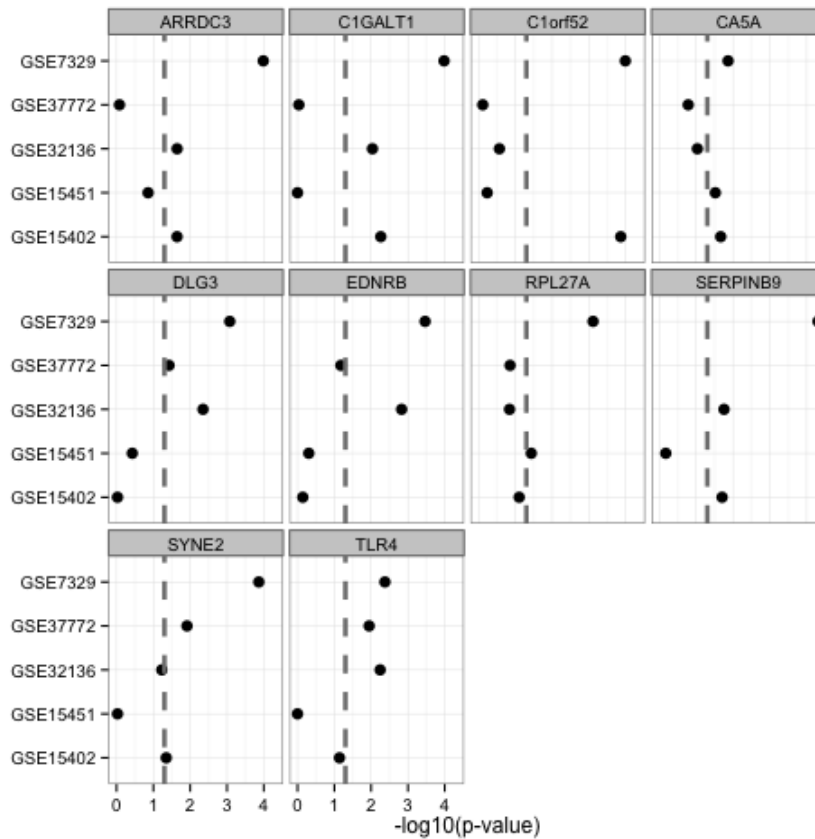

Supplementary Figure 14: P-values of core LCL signatures in individual studies. Dotted lines indicate p-value threshold of 0.05. a) Up-regulated genes. b) Down-regulated genes.

(a)

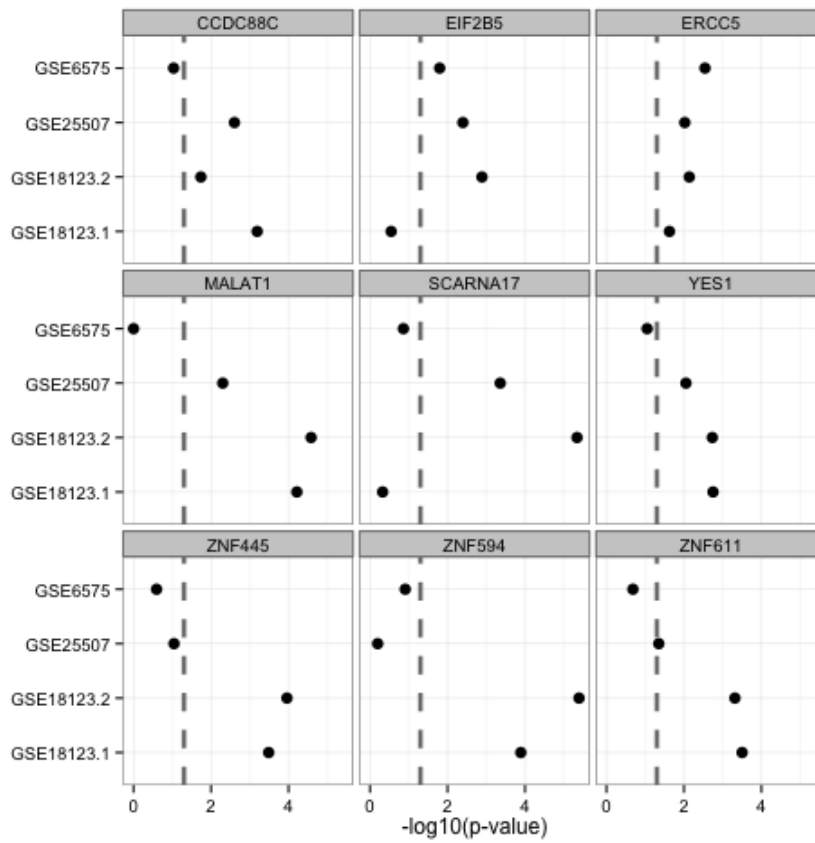

(b)

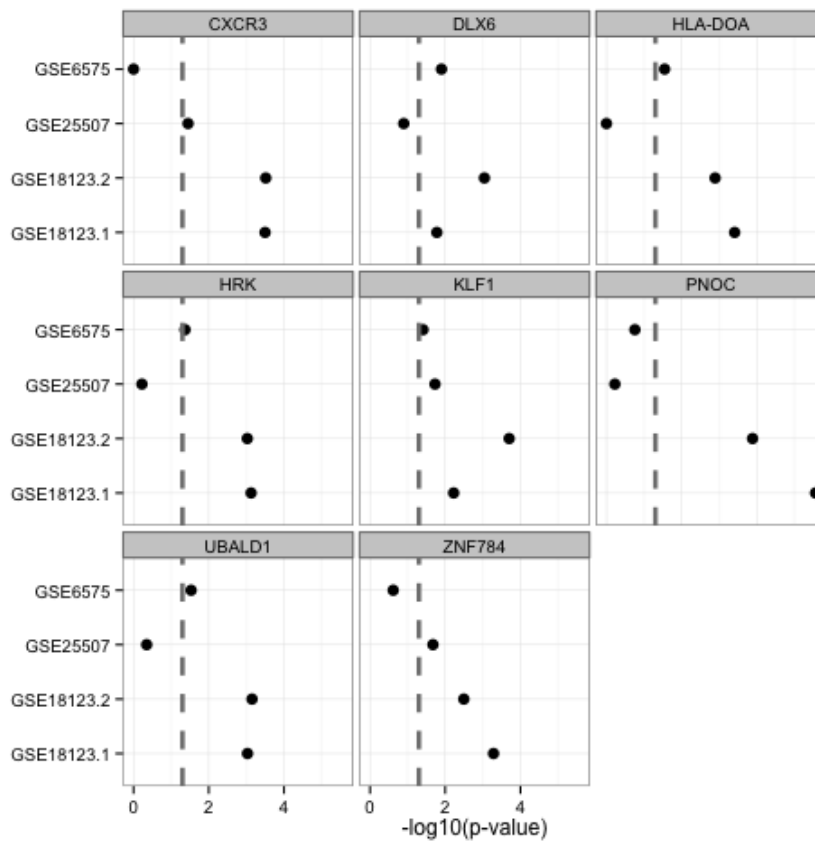

Supplementary Figure 15: P-values of core non-LCL signatures in individual studies. Dotted lines indicate p-value threshold of 0.05. a) Up-regulated genes. b) Down-regulated genes.

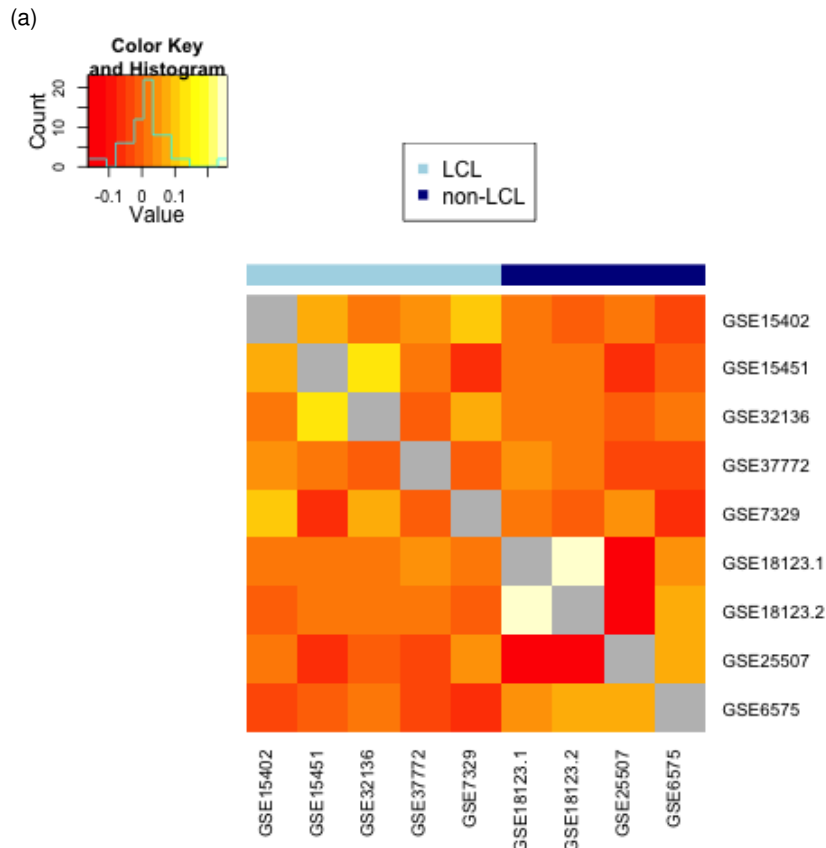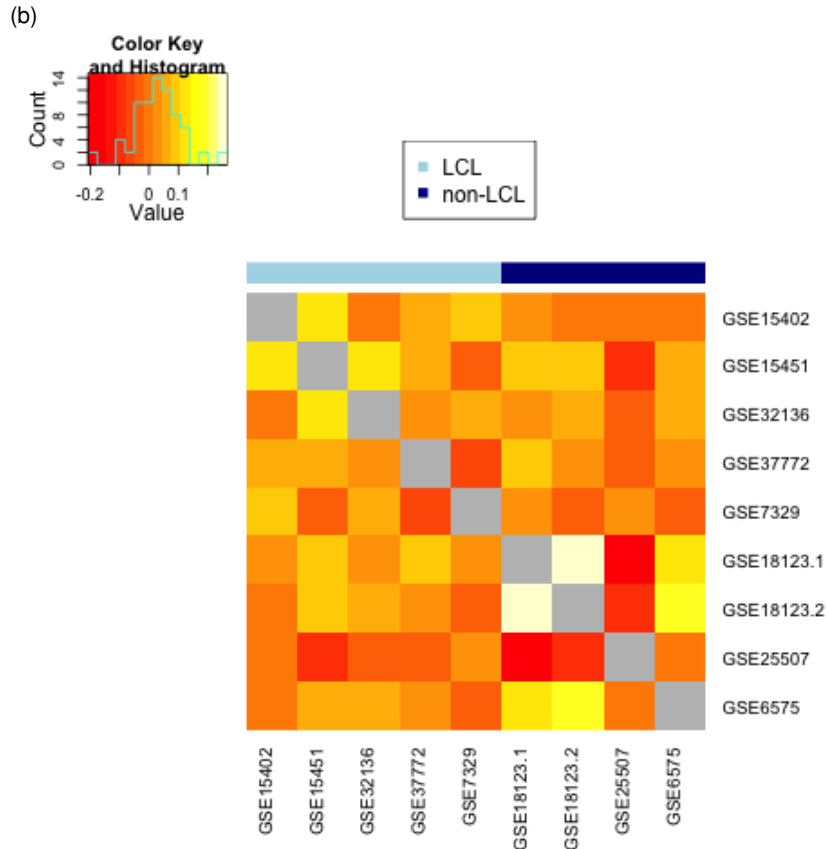

Supplementary Figure 16: Heatmaps illustrating spearman ranked correlations (scaled) of p-values among blood datasets.



## References

- [1] Gautier, L., Cope, L., Bolstad, B. M., and Irizarry, R. A. (2004) *Bioinformatics* **20(3)**, 307–315.
- [2] Du, P., Kibbe, W. A., and Lin, S. M. July 2008 *Bioinformatics* **24(13)**, 1547–1548 PMID: 18467348.
- [3] Churchill, G. A. December 2002 *Nat Genet* **32**, 490–495.
- [4] Johnson, W. E., Li, C., and Rabinovic, A. January 2007 *Biostat* **8(1)**, 118–127 PMID: 16632515.
- [5] Zoubarov, A., Hamer, K. M., Keshav, K. D., McCarthy, E. L., Santos, J. R. C., Van Rossum, T., McDonald, C., Hall, A., Wan, X., Lim, R., Gillis, J., and Pavlidis, P. July 2012 *Bioinformatics* **28(17)**, 2272–3 PMID: 22782548.
- [6] Ramasamy, A., Mondry, A., Holmes, C. C., and Altman, D. G. September 2008 *PLoS Med* **5(9)**, e184.
- [7] Fisher, R. (1948) *American Statistician* **2:30**.
- [8] Benjamini, Y. and Hochberg, Y. (1995) *Journal of the Royal Statistical Society Series B(57)*, 289–300.
- [9] Kang, H. J., Kawasawa, Y. I., Cheng, F., Zhu, Y., Xu, X., Li, M., Sousa, A. M. M., Pletikos, M., Meyer, K. A., Sedmak, G., Guennel, T., Shin, Y., Johnson, M. B., Krsnik, u., Mayer, S., Fertuzinhos, S., Umlauf, S., Lisgo, S. N., Vortmeyer, A., Weinberger, D. R., Mane, S., Hyde, T. M., Huttner, A., Reimers, M., Kleinman, J. E., and Å estan, N. October 2011 *Nature* **478(7370)**, 483–489.
- [10] Whitney, A. R., Diehn, M., Popper, S. J., Alizadeh, A. A., Boldrick, J. C., Relman, D. A., and Brown, P. O. February 2003 *PNAS* **100(4)**, 1896–1901 PMID: 12578971.
- [11] Carrel, L. and Willard, H. F. March 2005 *Nature* **434(7031)**, 400–404.
- [12] Mistry, M. and Pavlidis, P. (2010) *Neuroscience* **167**, 384–95 2.
- [13] Mistry, M., Gillis, J., and Pavlidis, P. February 2013 *Mol Psychiatry* **18(2)**, 215–225.
- [14] Lee, H. K., Braynen, W., Keshav, K., and Pavlidis, P. (2005) *BMC Bioinformatics* **6**, 269 PMID: 16280084.
- [15] Ashburner, M., Ball, C. A., Blake, J. A., Botstein, D., Butler, H., Cherry, J. M., Davis, A. P., Dolinski, K., Dwight, S. S., Eppig, J. T., Harris, M. A., Hill, D. P., Issel-Tarver, L., Kasarskis, A., Lewis, S., Matese, J. C., Richardson, J. E., Ringwald, M., Rubin, G. M., and Sherlock, G. May 2000 *Nat. Genet.* **25(1)**, 25–29 PMID: 10802651.
- [16] Gillis, J., Mistry, M., and Pavlidis, P. June 2010 *Nat. Protocols* **5(6)**, 1148–1159.
- [17] Portales-Casamar, E., Ch'ng, C., Lui, F., St-Georges, N., Zoubarov, A., Lai, A. Y., Lee, M., Kwok, C., Kwok, W., Tseng, L., and Pavlidis, P. February 2013 *BMC Genomics* **14(1)**, 129 PMID: 23442263.
- [18] Garbett, K., Ebert, P. J., Mitchell, A., Lintas, C., Manzi, B., Mirnics, K., and Persico, A. M. June 2008 *Neurobiol Dis* **30(3)**, 303–311 PMID: 18378158 PMCID: PMC2693090.
- [19] Purcell, A. E., Jeon, O. H., Zimmerman, A. W., Blue, M. E., and Pevsner, J. November 2001 *Neurology* **57(9)**, 1618–1628 PMID: 11706102.

- [20] Glatt, S. J., Tsuang, M. T., Winn, M., Chandler, S. D., Collins, M., Lopez, L., Weinfeld, M., Carter, C., Schork, N., Pierce, K., and Courchesne, E. September 2012 *J Am Acad Child Adolesc Psychiatry* 51(9), 934–944.e2 PMID: 22917206.
- [21] Hu, V. W., Frank, B. C., Heine, S., Lee, N. H., and Quackenbush, J. (2006) *BMC Genomics* 7, 118 PMID: 16709250.
- [22] Marshall, C. R., Noor, A., Vincent, J. B., Lionel, A. C., Feuk, L., Skaug, J., Shago, M., Moessner, R., Pinto, D., Ren, Y., Thiruvahindrapduram, B., Fiebig, A., Schreiber, S., Friedman, J., Ketelaars, C. E. J., Vos, Y. J., Ficocioglu, C., Kirkpatrick, S., Nicolson, R., Sloman, L., Summers, A., Gibbons, C. A., Teebi, A., Chitayat, D., Weksberg, R., Thompson, A., Vardy, C., Crosbie, V., Luscombe, S., Baatjes, R., Zwaigenbaum, L., Roberts, W., Fernandez, B., Szatmari, P., and Scherer, S. W. February 2008 *Am. J. Hum. Genet.* 82(2), 477–488 PMID: 18252227.
- [23] Sanders, S. J., Ercan-Sencicek, A. G., Hus, V., Luo, R., Murtha, M. T., Moreno-De-Luca, D., Chu, S. H., Moreau, M. P., Gupta, A. R., Thomson, S. A., Mason, C. E., Bilguvar, K., Celestino-Soper, P. B. S., Choi, M., Crawford, E. L., Davis, L., Wright, N. R. D., Dhodapkar, R. M., DiCola, M., DiLullo, N. M., Fernandez, T. V., Fielding-Singh, V., Fishman, D. O., Frahm, S., Garagaloyan, R., Goh, G. S., Kammela, S., Klei, L., Lowe, J. K., Lund, S. C., McGrew, A. D., Meyer, K. A., Moffat, W. J., Murdoch, J. D., O’Roak, B. J., Ober, G. T., Pottenger, R. S., Raubeson, M. J., Song, Y., Wang, Q., Yaspan, B. L., Yu, T. W., Yurkiewicz, I. R., Beaudet, A. L., Cantor, R. M., Curland, M., Grice, D. E., GÅ¼nel, M., Lifton, R. P., Mane, S. M., Martin, D. M., Shaw, C. A., Sheldon, M., Tischfield, J. A., Walsh, C. A., Morrow, E. M., Ledbetter, D. H., Fombonne, E., Lord, C., Martin, C. L., Brooks, A. I., Sutcliffe, J. S., Cook, Edwin H, J., Geschwind, D., Roeder, K., Devlin, B., and State, M. W. June 2011 *Neuron* 70(5), 863–885 PMID: 21658581.
- [24] Pinto, D., Pagnamenta, A. T., Klei, L., Anney, R., Merico, D., Regan, R., Conroy, J., Magalhaes, T. R., Correia, C., Abrahams, B. S., Almeida, J., Bacchelli, E., Bader, G. D., Bailey, A. J., Baird, G., Battaglia, A., Berney, T., Bolshakova, N., Bölte, S., Bolton, P. F., Bourgeron, T., Brennan, S., Brian, J., Bryson, S. E., Carson, A. R., Casallo, G., Casey, J., Chung, B. H. Y., Cochrane, L., Corsello, C., Crawford, E. L., Crossett, A., Cytrynbaum, C., Dawson, G., deJonge, M., Delorme, R., Drmic, I., Duketis, E., Duque, F., Estes, A., Farrar, P., Fernandez, B. A., Folstein, S. E., Fombonne, E., Freitag, C. M., Gilbert, J., Gillberg, C., Glessner, J. T., Goldberg, J., Green, A., Green, J., Guter, S. J., Hakonarson, H., Heron, E. A., Hill, M., Holt, R., Howe, J. L., Hughes, G., Hus, V., Iglizoi, R., Kim, C., Klauck, S. M., Kolevzon, A., Korvatska, O., Kustanovich, V., Lajonchere, C. M., Lamb, J. A., Laskawiec, M., Leboyer, M., Le Couteur, A., Leventhal, B. L., Lionel, A. C., Liu, X.-Q., Lord, C., Lotspeich, L., Lund, S. C., Maestrini, E., Mahoney, W., Mantoulan, C., Marshall, C. R., McConachie, H., McDougle, C. J., McGrath, J., McMahon, W. M., Merikangas, A., Migita, O., Minshew, N. J., Mirza, G. K., Munson, J., Nelson, S. F., Noakes, C., Noor, A., Nygren, G., Oliveira, G., Papanikolaou, K., Parr, J. R., Parrini, B., Paton, T., Pickles, A., Pilorge, M., Piven, J., Ponting, C. P., Posey, D. J., Poustka, A., Poustka, F., Prasad, A., Ragoussis, J., Renshaw, K., Rickaby, J., Roberts, W., Roeder, K., Roge, B., Rutter, M. L., Bierut, L. J., Rice, J. P., Salt, J., Sansom, K., Sato, D., Segurado, R., Sequeira, A. F., Senman, L., Shah, N., Sheffield, V. C., Soorya, L., Sousa, I., Stein, O., Sykes, N., Stoppioni, V., Strawbridge, C., Tancredi, R., Tansey, K., Thiruvahindrapduram, B., Thompson, A. P., Thomson, S., Tryfon, A., Tsiantis, J., Van Engeland, H., Vincent, J. B., Volkmar, F., Wallace, S., Wang, K., Wang, Z., Wassink, T. H., Webber, C., Weksberg, R., Wing, K., Wittmeyer, K., Wood, S., Wu, J., Yaspan, B. L., Zurawiecki, D., Zwaigenbaum, L., Buxbaum, J. D., Cantor, R. M., Cook, E. H., Coon, H., Cuccaro, M. L., Devlin, B., Ennis, S., Gallagher, L., Geschwind, D. H., Gill, M., Haines, J. L.,

- Hallmayer, J., Miller, J., Monaco, A. P., Nurnberger Jr, J. I., Paterson, A. D., Pericak-Vance, M. A., Schellenberg, G. D., Szatmari, P., Vicente, A. M., Vieland, V. J., Wijsman, E. M., Scherer, S. W., Sutcliffe, J. S., and Betancur, C. July 2010 *Nature* 466(7304), 368–372.
- [25] Iafrate, A. J., Feuk, L., Rivera, M. N., Listewnik, M. L., Donahoe, P. K., Qi, Y., Scherer, S. W., and Lee, C. September 2004 *Nat Genet* 36(9), 949–951.
- [26] Hinrichs, A. S., Karolchik, D., Baertsch, R., Barber, G. P., Bejerano, G., Clawson, H., Diekhans, M., Furey, T. S., Harte, R. A., Hsu, F., Hillman-Jackson, J., Kuhn, R. M., Pedersen, J. S., Pohl, A., Raney, B. J., Rosenbloom, K. R., Siepel, A., Smith, K. E., Sugnet, C. W., Sultan-Qurraie, A., Thomas, D. J., Trumbower, H., Weber, R. J., Weirauch, M., Zweig, A. S., Haussler, D., and Kent, W. J. January 2006 *Nucleic Acids Res* 34(Database issue), D590–D598 PMID: 16381938 PMCID: PMC1347506.
- [27] Barnes, M., Freudenberg, J., Thompson, S., Aronow, B., and Pavlidis, P. (2005) *Nucleic Acids Res* 33, 5914–23 18.
- [28] Prasad, T. S. K., Kandasamy, K., and Pandey, A. (2009) *Methods Mol. Biol.* 577, 67–79 PMID: 19718509.
- [29] Chatr-aryamontri, A., Ceol, A., Palazzi, L. M., Nardelli, G., Schneider, M. V., Castagnoli, L., and Cesareni, G. January 2007 *Nucl. Acids Res.* 35(suppl 1), D572–D574 PMID: 17135203.
- [30] Xenarios, I., Rice, D. W., Salwinski, L., Baron, M. K., Marcotte, E. M., and Eisenberg, D. January 2000 *Nucleic Acids Res* 28(1), 289–291 PMID: 10592249 PMCID: PMC102387.
- [31] Lynn, D. J., Winsor, G. L., Chan, C., Richard, N., Laird, M. R., Barsky, A., Gardy, J. L., Roche, F. M., Chan, T. H. W., Shah, N., Lo, R., Naseer, M., Que, J., Yau, M., Acab, M., Tulpan, D., Whiteside, M. D., Chikatamarla, A., Mah, B., Munzner, T., Hokamp, K., Hancock, R. E. W., and Brinkman, F. S. L. September 2008 *Mol Syst Biol* 4(1).
- [32] Razick, S., Magklaras, G., and Donaldson, I. M. September 2008 *BMC Bioinformatics* 9(1), 405 PMID: 18823568.
